# Supplementary material for: Citrus Fruits as Source of Novel Bioactive Peptides: in-vitro and in-silico Analysis of Atheroprotective Potentials
Source: Royal Society of Chemistry journal article supplement (doi:10.1039/d2fo01129h), 2022-01-01

Figure S1 Standard Calibration Curves for *in-vitro* Assays

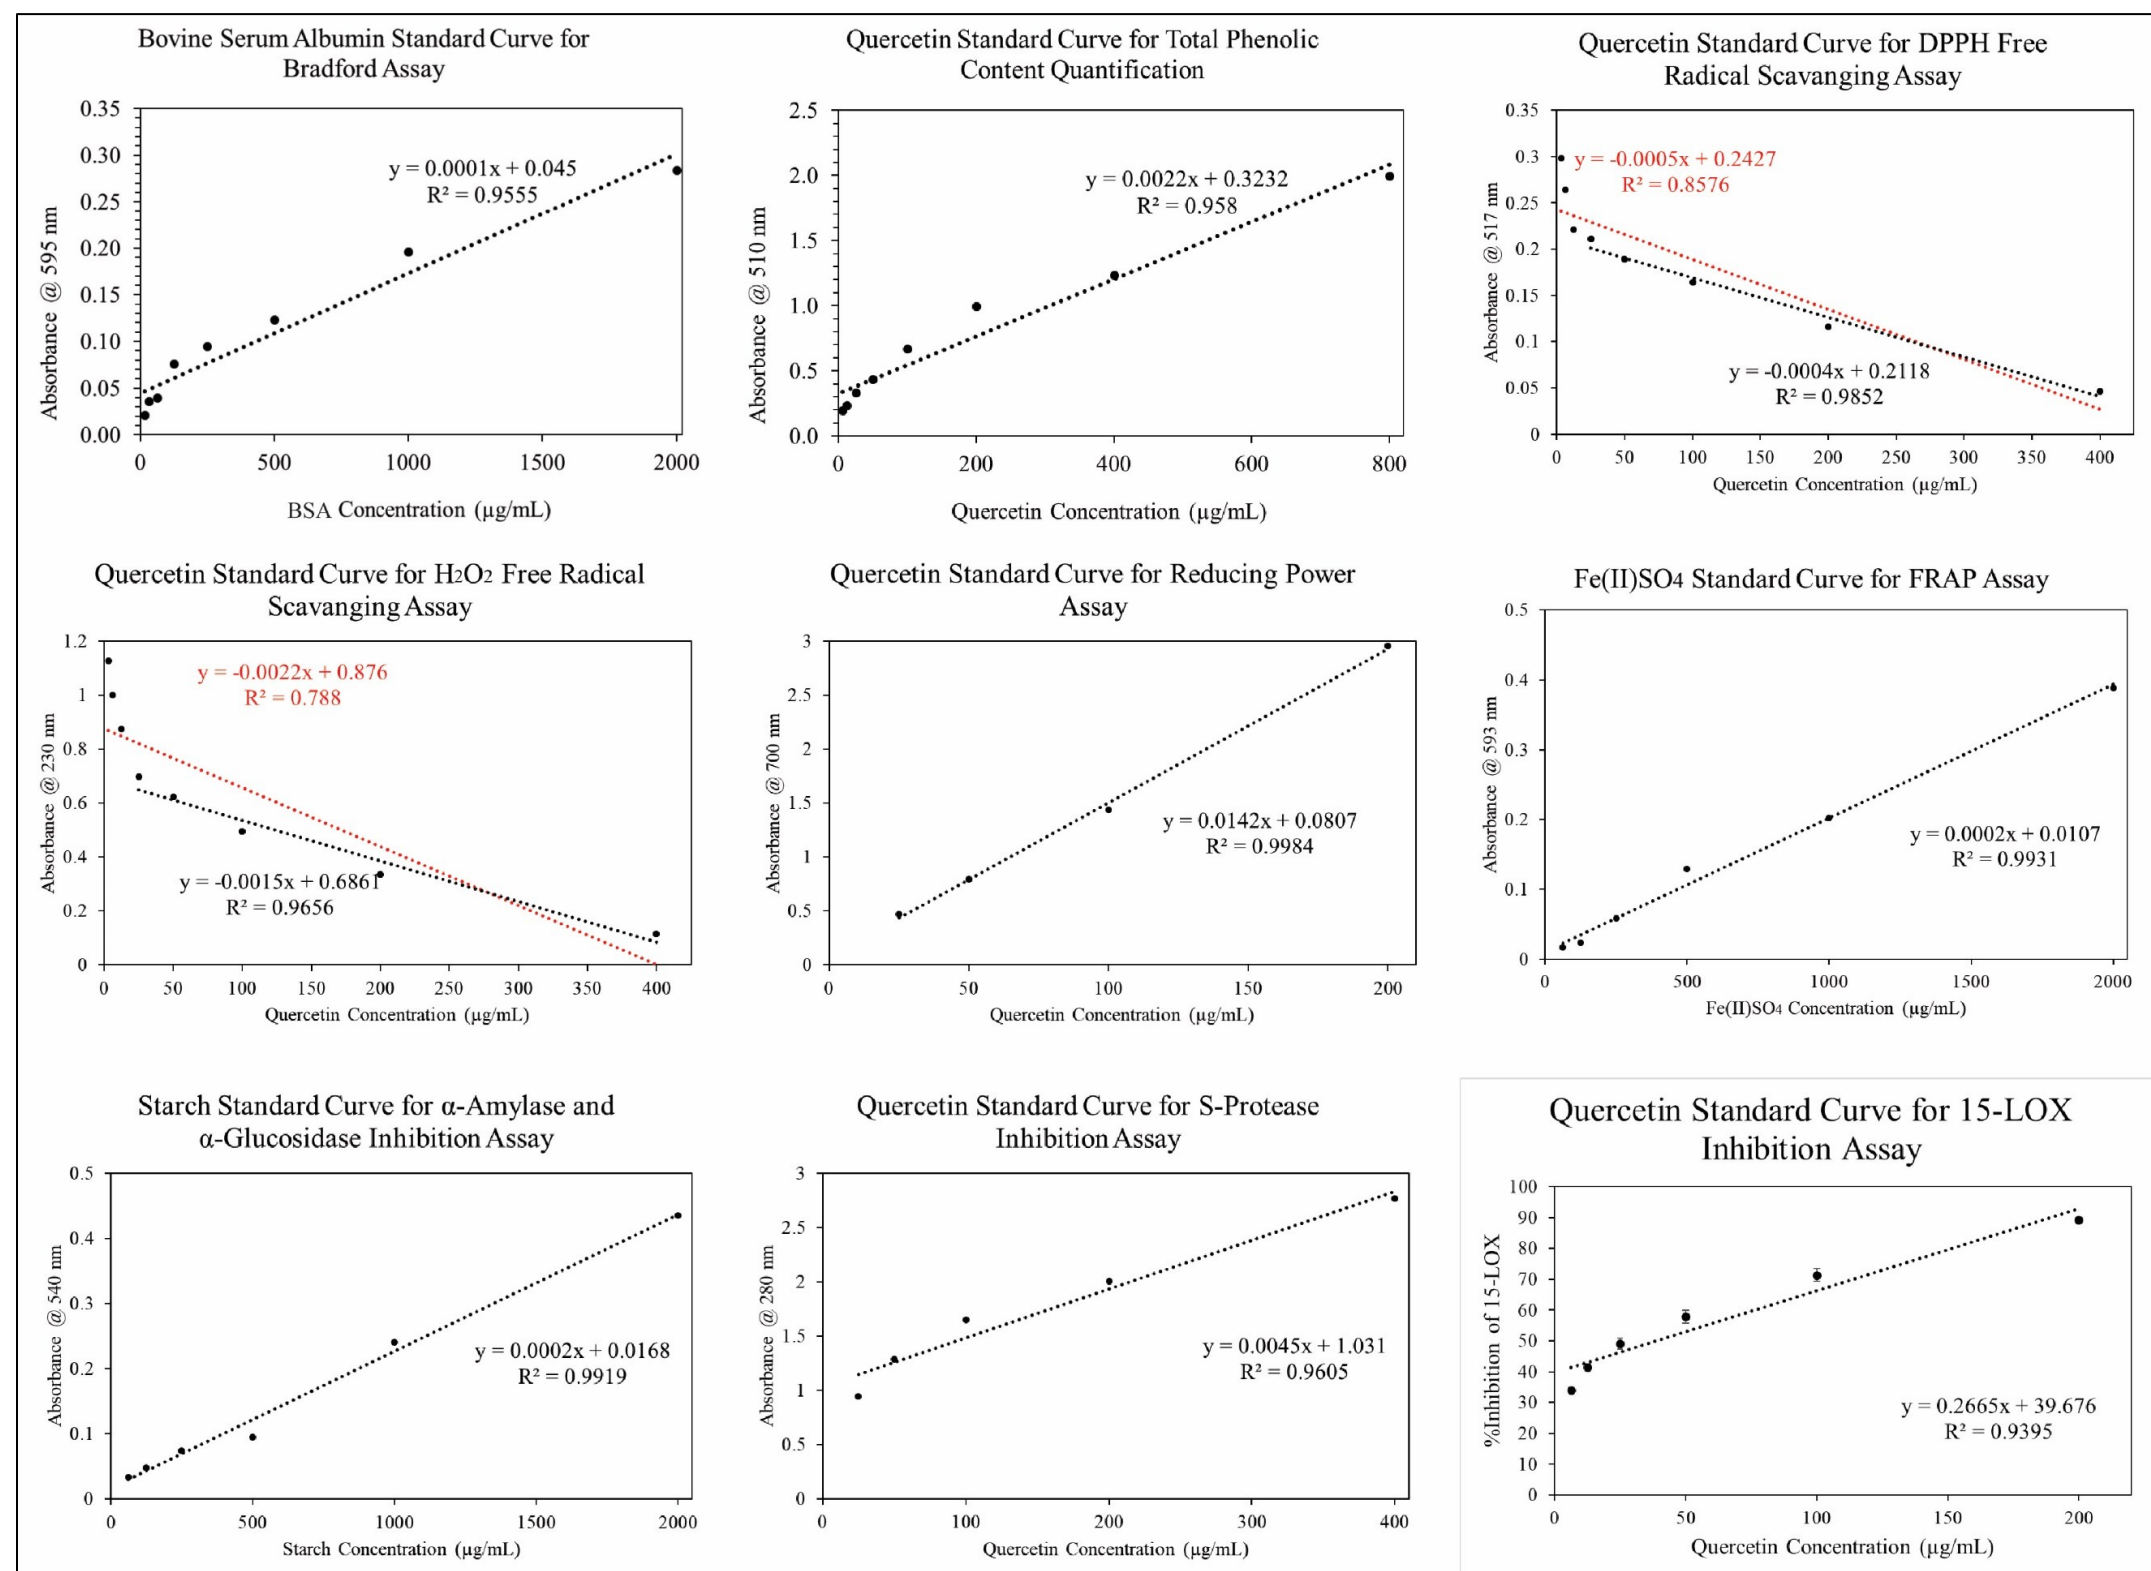

Figure S2A MS Spectra for Identified Peptide Sequences from BARI Lebu-2 Peel dPRE

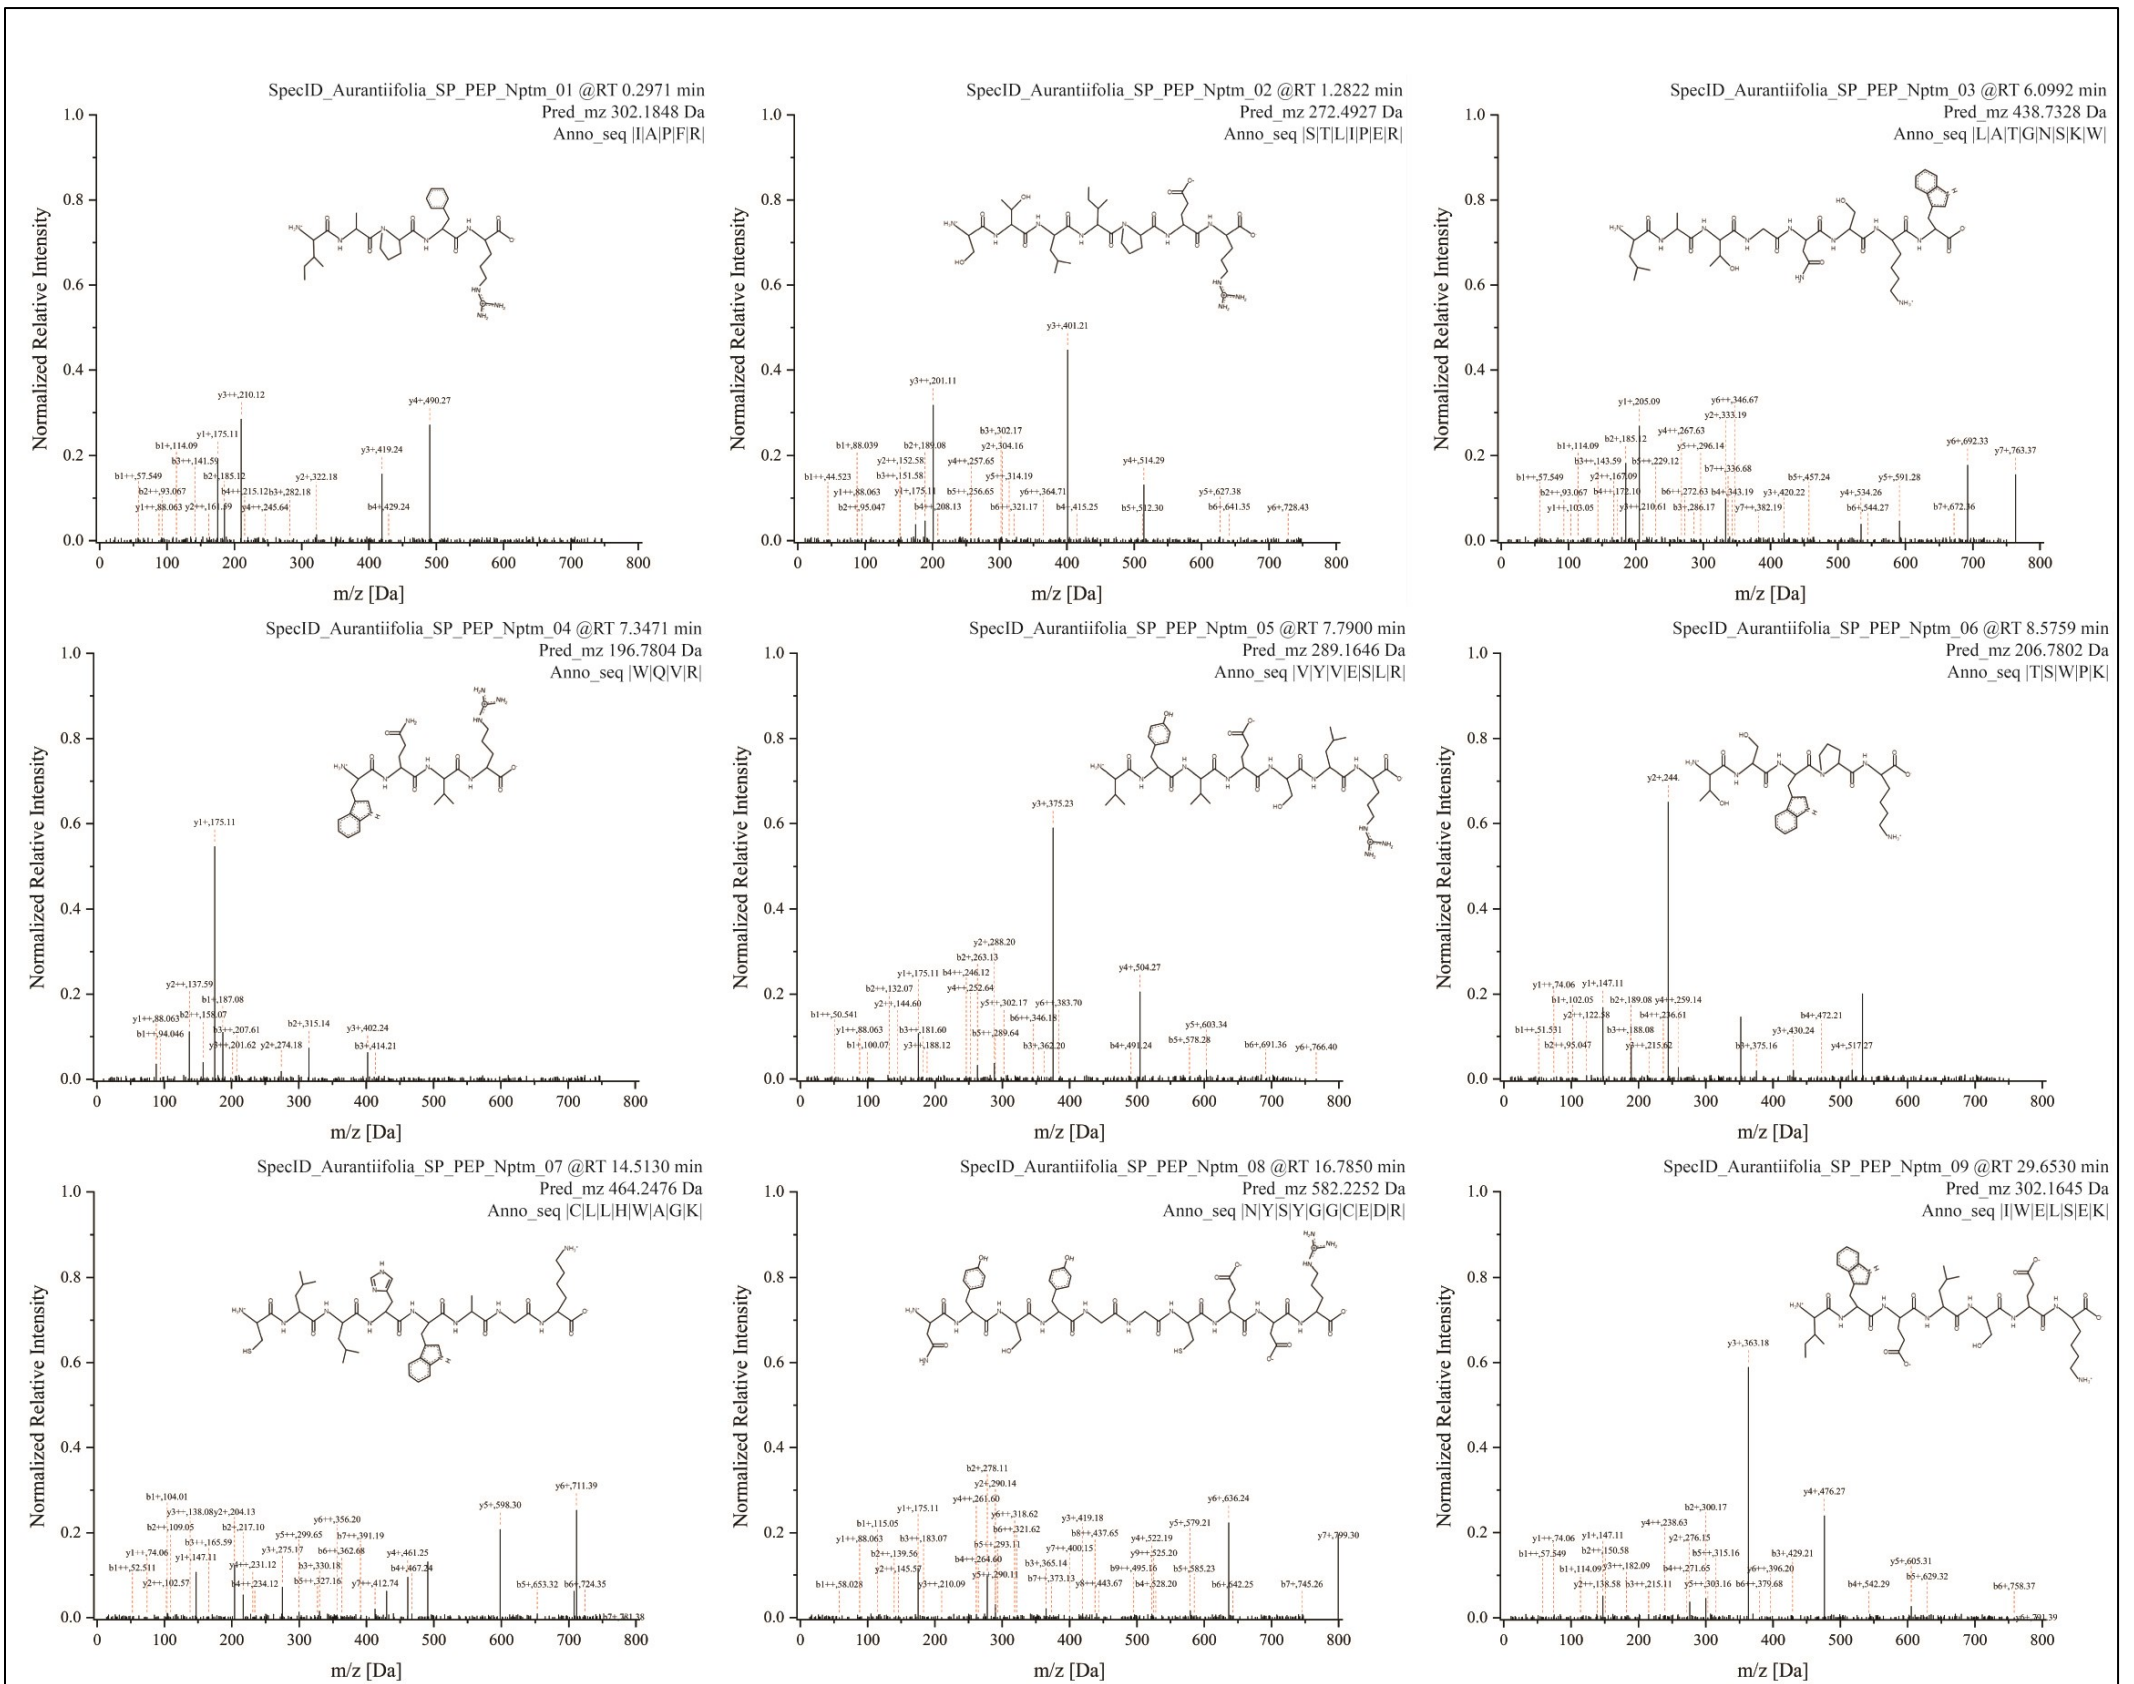

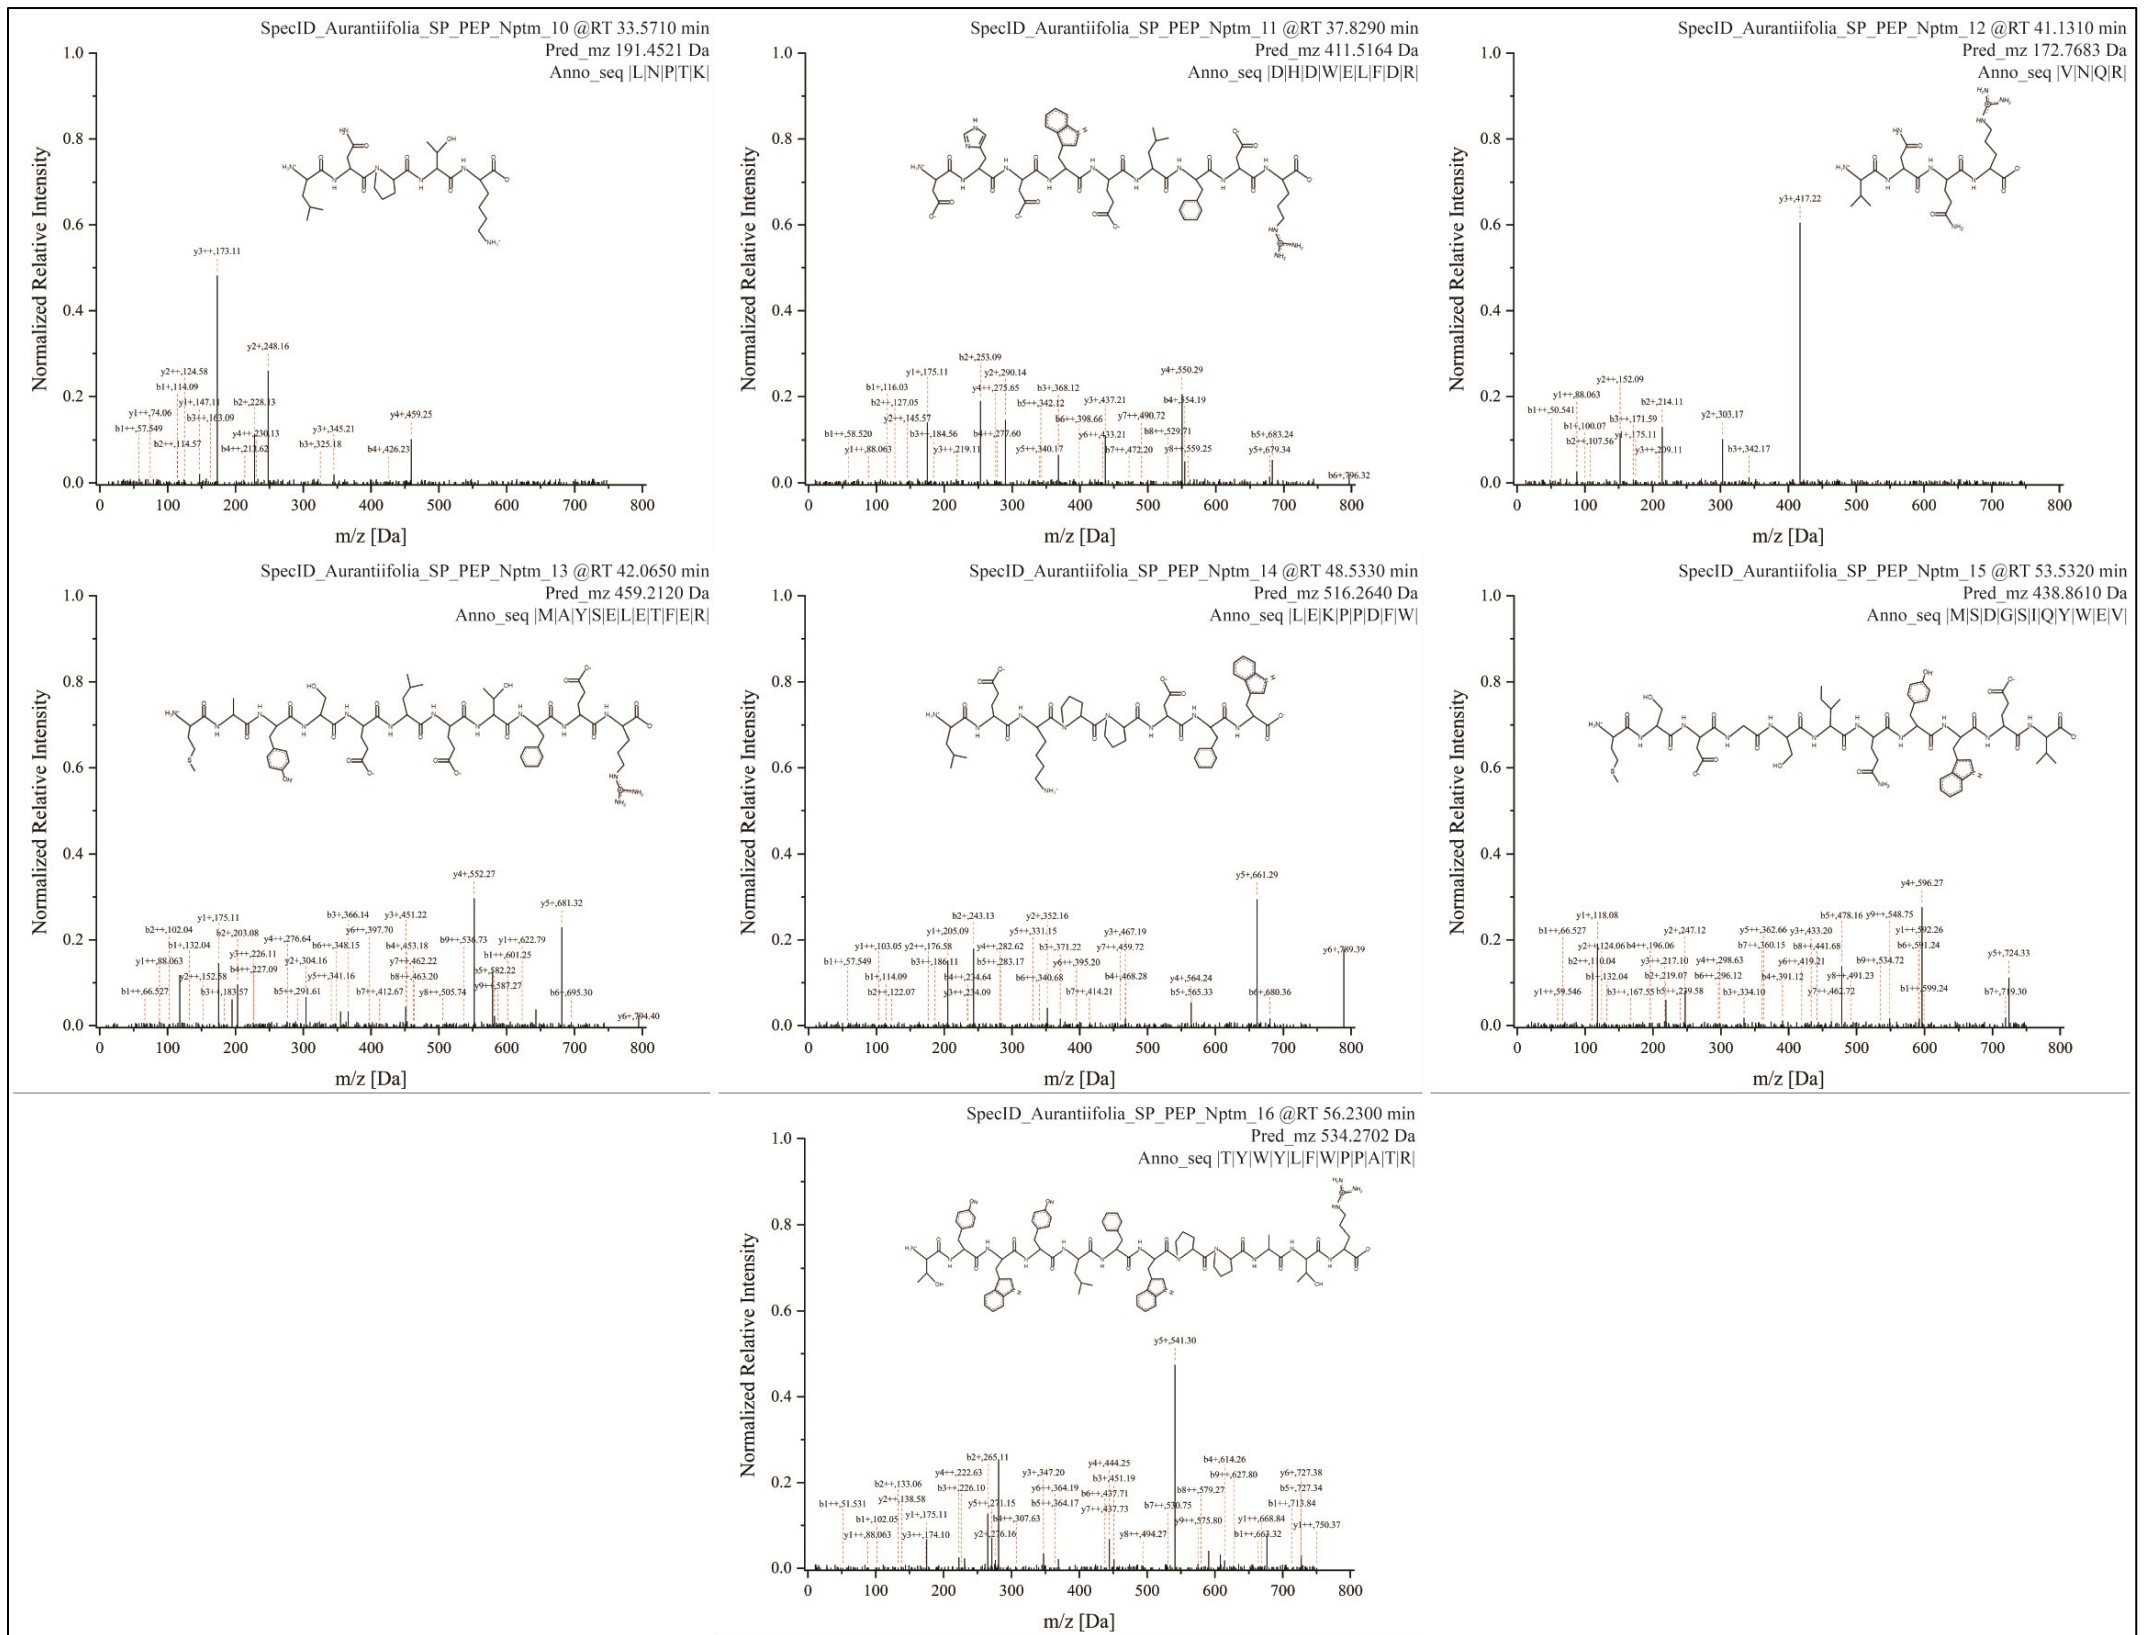



Figure S2B MS Spectra for Identified Peptide Sequences from Gandharaj Pulp dPRE

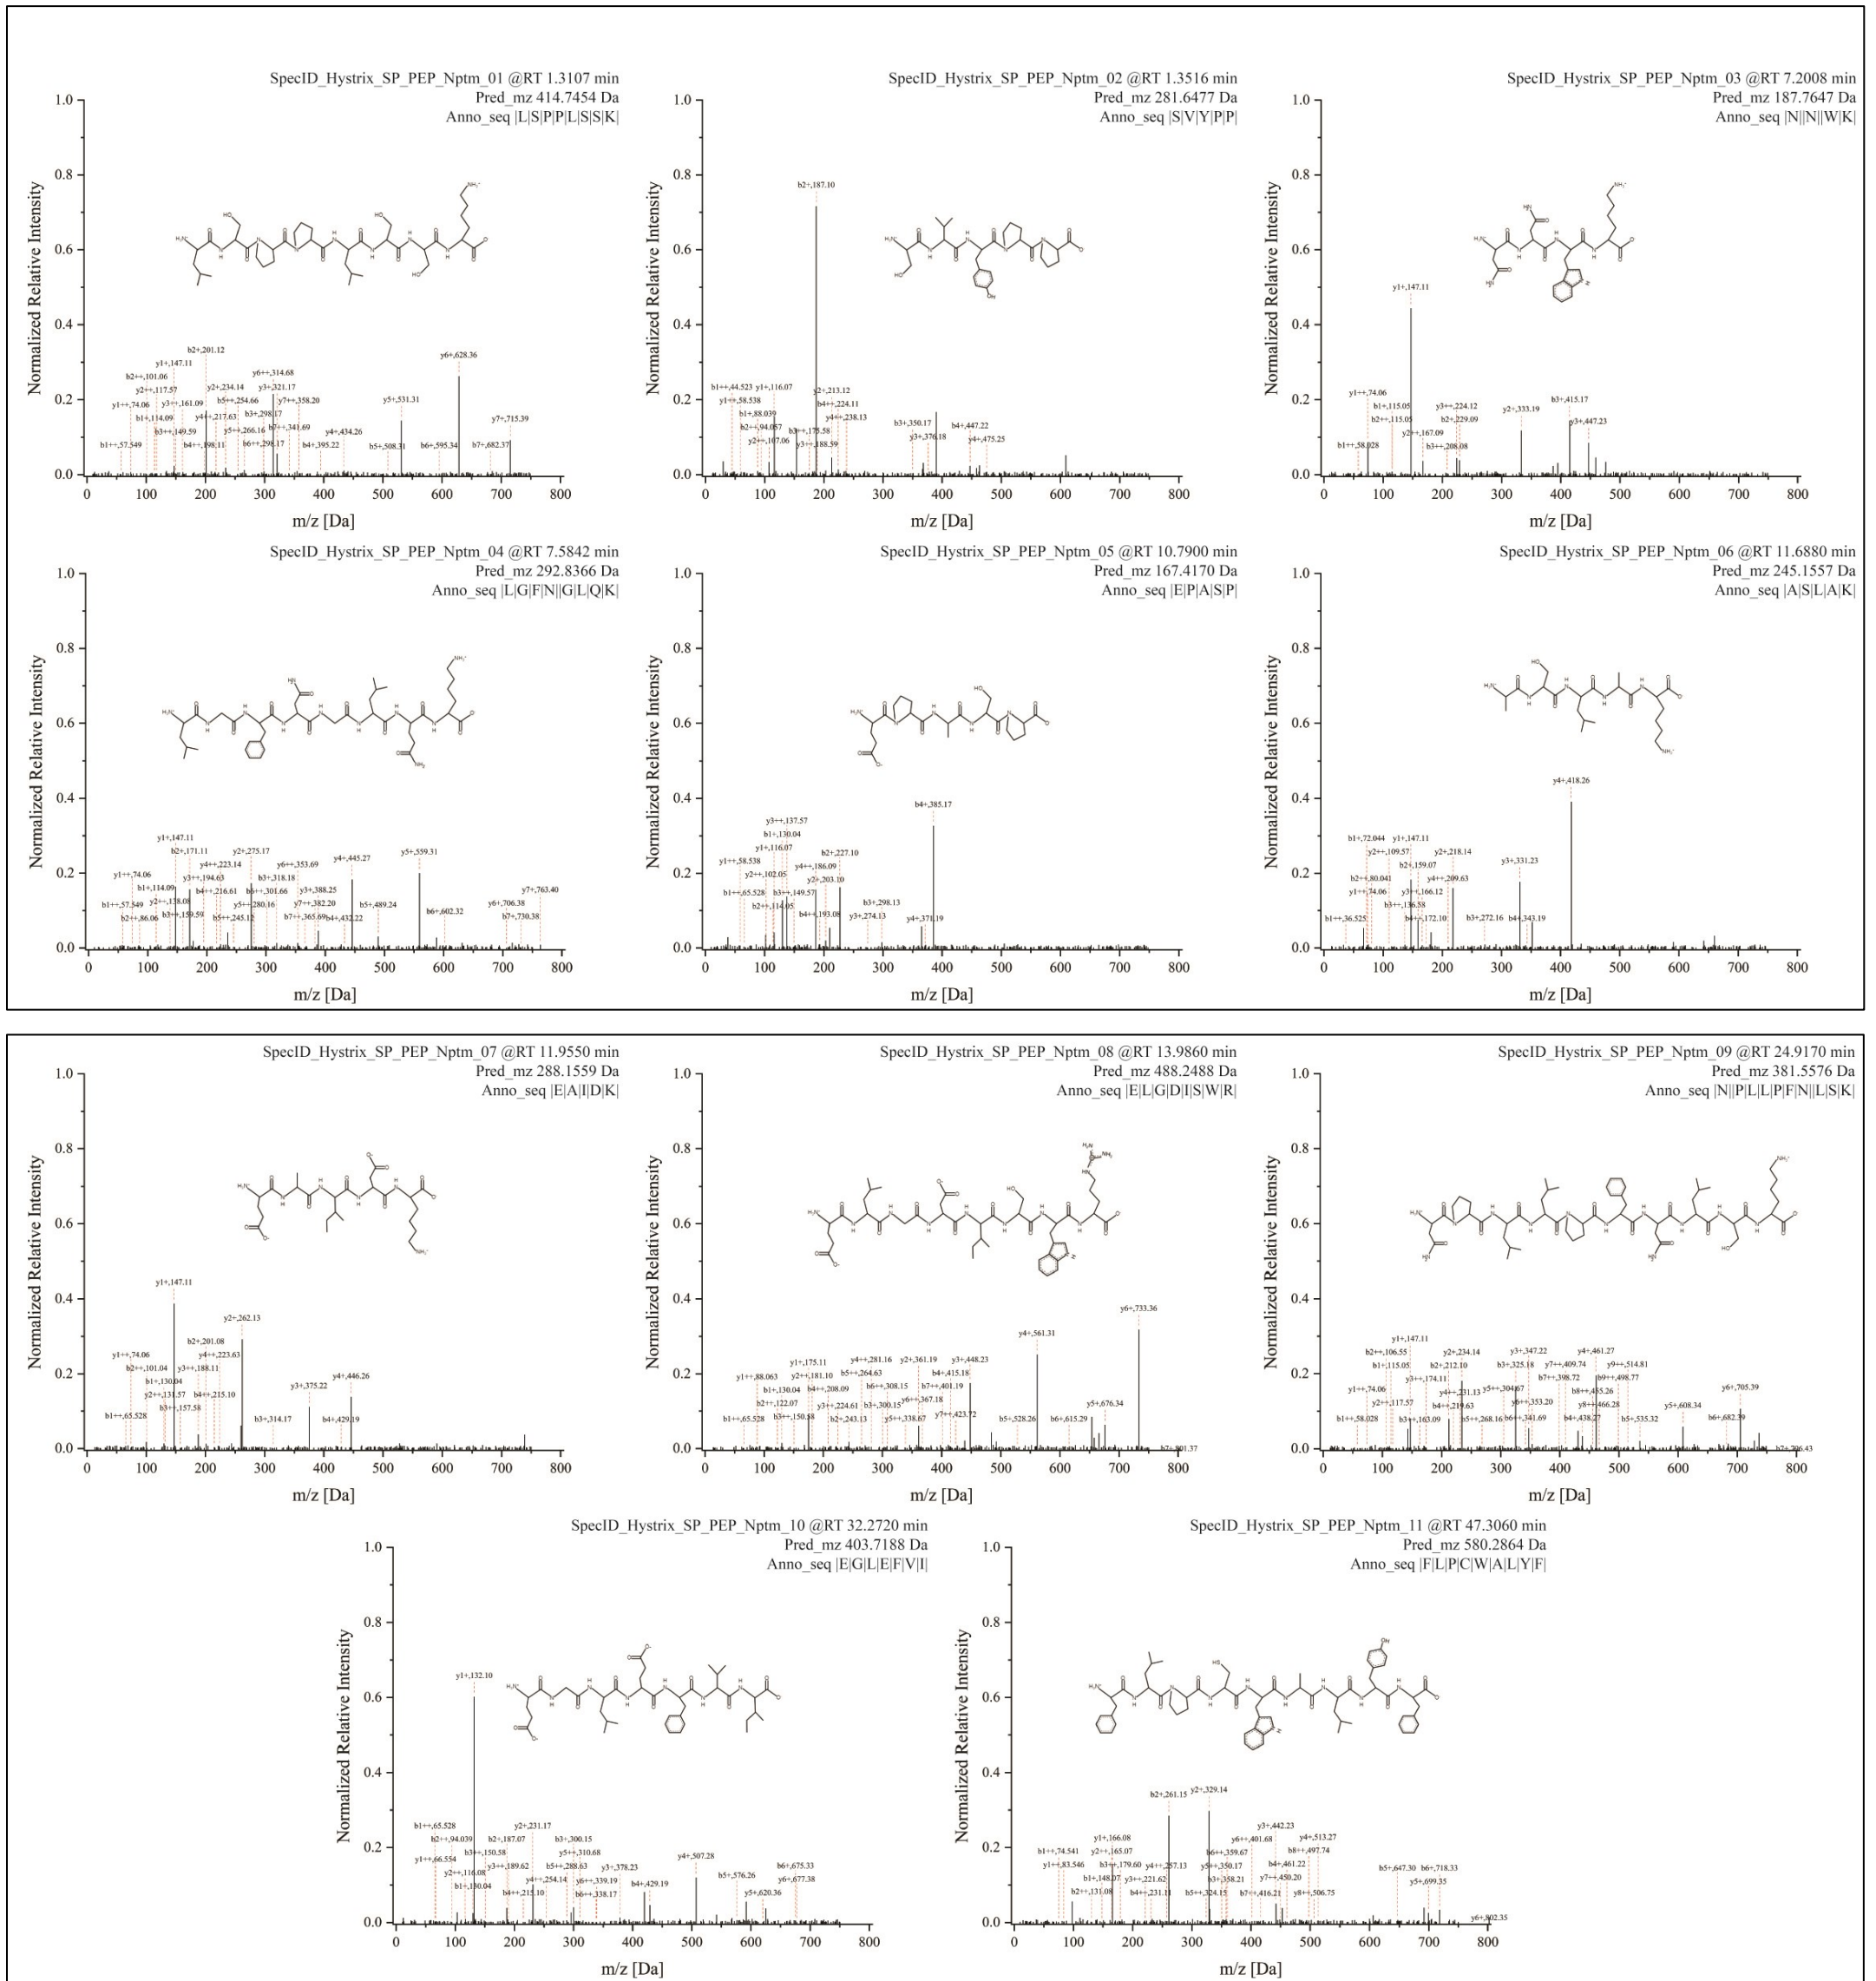

**Figure S3 Inconsistent co-precipitation of pigmented/complexated contaminants after initial precipitation steps and subsequent removal in later steps**

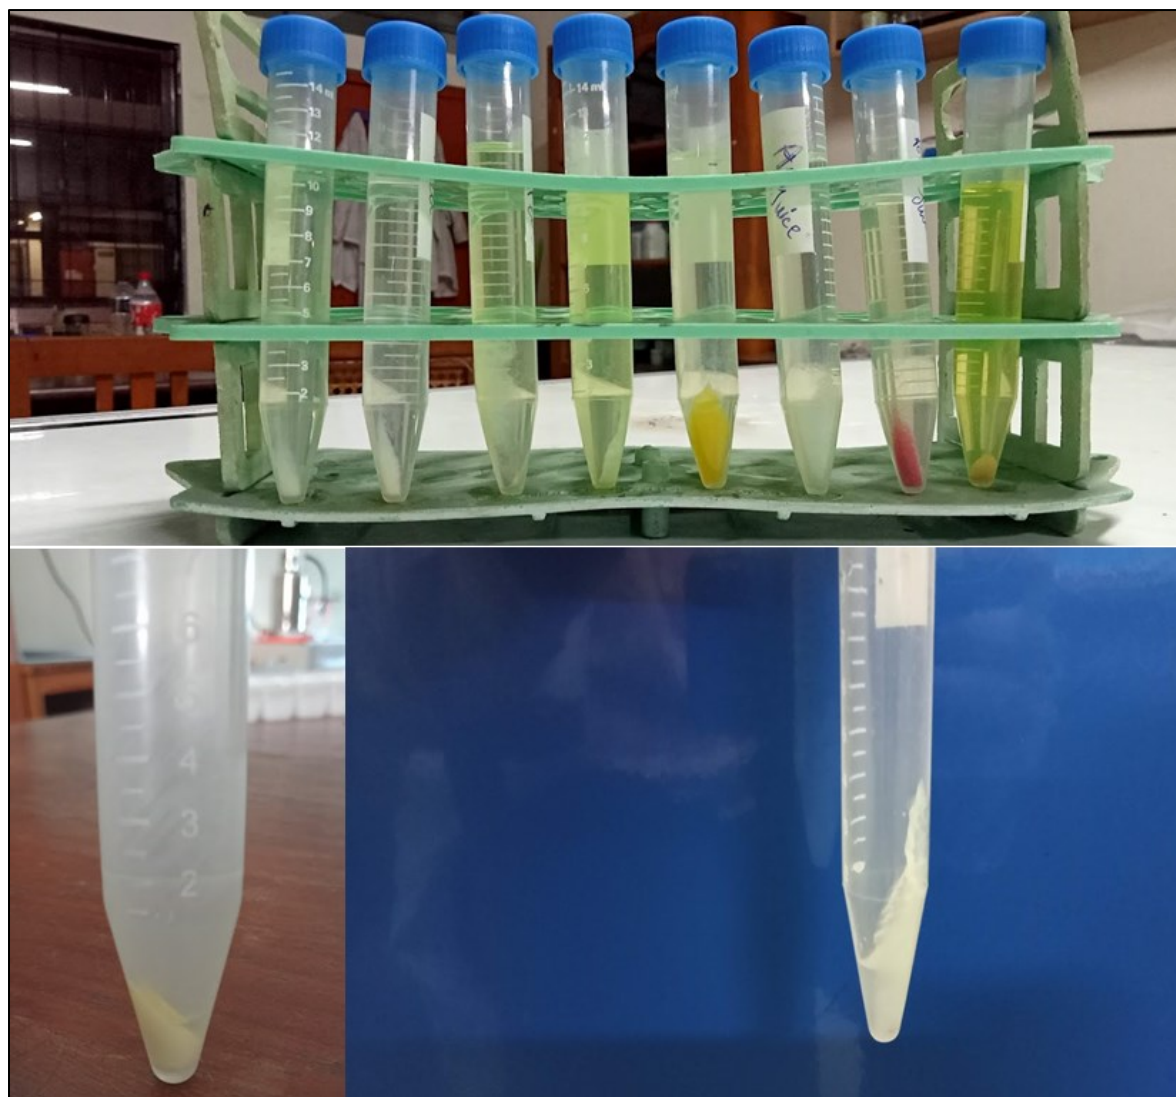

**Figure S4 Bulk extraction and lyophilization of peptide product for storage and LC-MS Analysis**

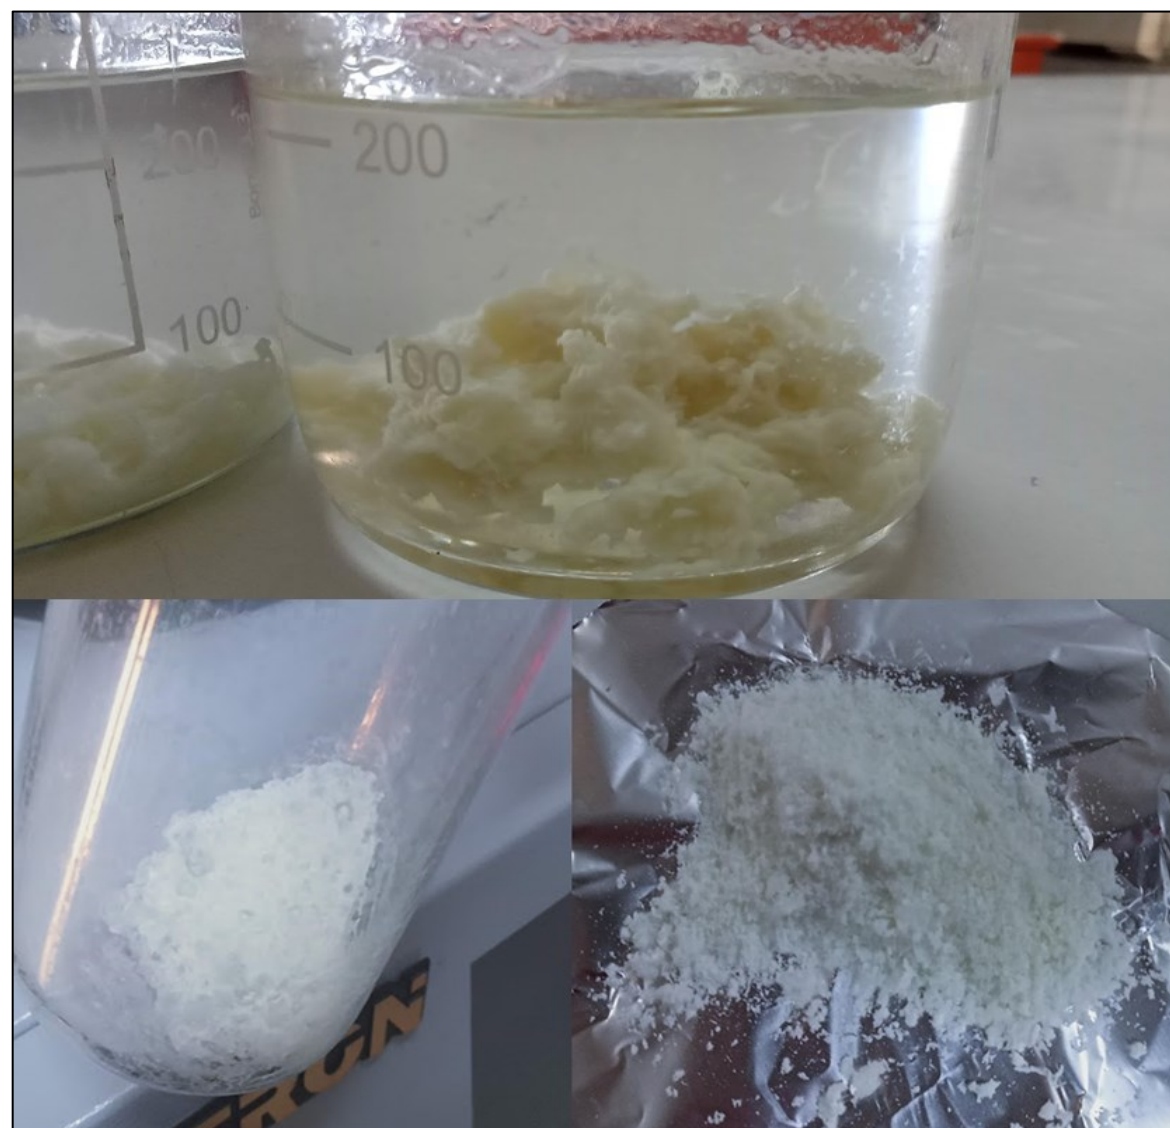



Figure S5 Summarized Methodology Outline of Study.

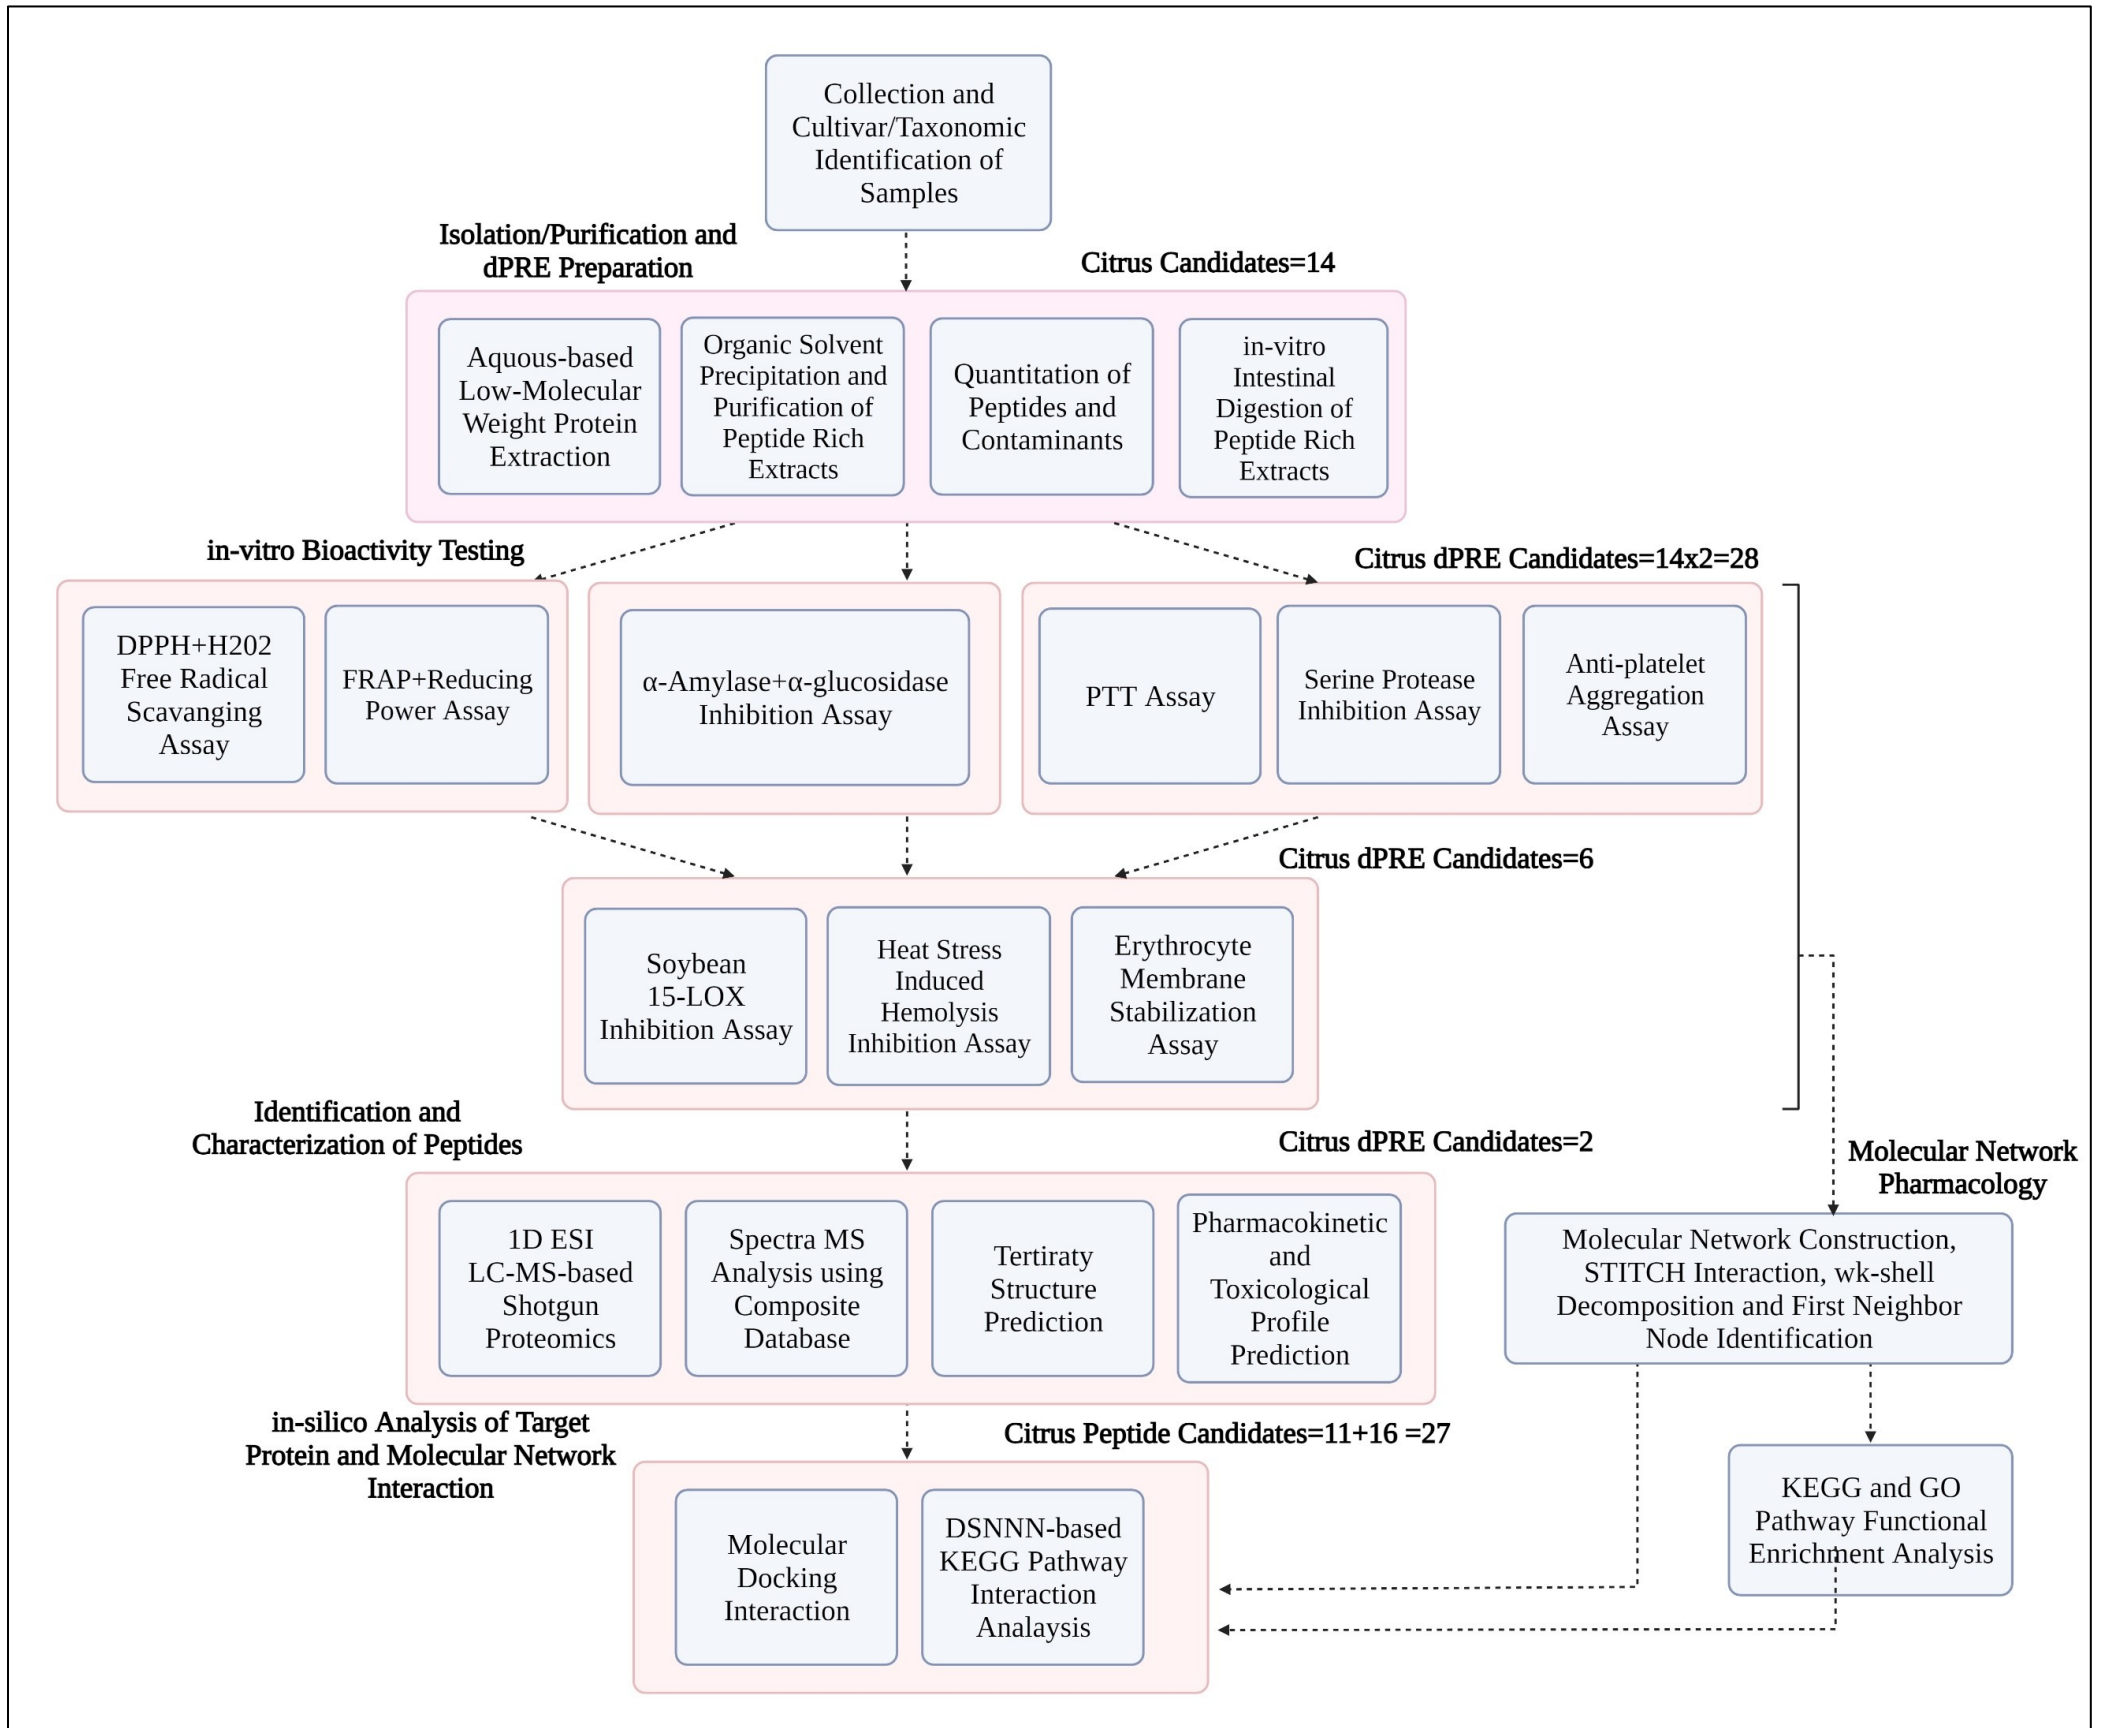

Supplement: d2fo01129h1.pdf [file d2fo01129h1.pdf]
