# Supplementary material for: Citrus Fruits as Source of Novel Bioactive Peptides: in-vitro and in-silico Analysis of Atheroprotective Potentials
Source: Royal Society of Chemistry journal article supplement (doi:10.1039/d2fo01129h), 2022-01-01
Supplement: d2fo01129h3.xlsx [file d2fo01129h3.xlsx]

## Sheet: Table S1
Table S1A: Currently Prescribed Therapeutic Interventions for Atherosclerotic Cardiovascular Diseases.
Drug Class	Prominent Examples	Primary Mechanism of Action	Reference/Review
Antioxidant Vitamins	Ascorbic Acid, α-Tocopherol, β-Carotene	Free radical scavenging and antioxidation	(Yang et al., 2017)
Metal Chelators	Edaravone, Carvedilol, Hydralazine,	Free radical scavenging and reduction of metal ion availability	(Gianazza et al., 2021)
Antiplatelets	Aspirin, Warfarin	Inhibition of platelet activation and atherothrombosis	(Libby et al., 2019)
β-Blockers	Atenolol, Propranolol, Bisoprolol etc.	Blocks effects of the epinephrine and vasodilates arterial walls	(Soehnlein & Libby, 2021)
NSAIDs	Celecoxib, Zileuton	Free radical scavenging and inhibition of PTGS	(Libby et al., 2019)
Natural Antioxidants	Quercetin, Baicalin, Curcumin, Epicatechin Gallate etc.	Underexplored	(Rafieian-Kopaei et al., 2014)
PUFAs	Linoleic acid, Fish oils	Underexplored	(Ito et al., 2019; Zielinski & Pratt, 2017)
Monoclonal Antibodies	Canakinumab, Tocilizumab, Eculizumab	Immunosuppressive targeting IL, IFN and TNF	(Libby, 2021; Soehnlein & Libby, 2021)
Anti-inflammatory Drugs	Colchicine, Methotrexate, PLA inhibitors	Unclear direct mechanisms; reduction of inflammatory biomarkers; reduces proinflammatory and cytotoxic products	(Jamkhande et al., 2014; Libby et al., 2019)
Cholesterol Absorption Regulators	CYP450 modulators, AMPK activators	Regulates glucose metabolism and cholesterol conversion	(Jamkhande et al., 2014)
PPAR Modulators	Clofibrate, Gemfibrozil, Ciprofibrate etc.	Decreases insulin resistance and suppresses immune hyperactivation; decreases TG-rich lipoproteins	(Jamkhande et al., 2014)
Statins	Atorvastatin, Fluvastatin, Lovastatin, Pravastatin etc.	Increase NOS expression and lower lipid levels in blood	(Libby et al., 2019; Yang et al., 2017)
Anti-hyperlipidemics	Probucol/succinobucol,	Free radical scavenging and LDL suppression	(Sobenin et al., 2013; J. Wang et al., 2015)
Anti-hyperglycemics	Metformin, Acarbose	Reduction of digestive increase of blood glucose levels; anti-obesity and anti-hyperlipidemia	(Gianazza et al., 2021)
ATlR antagonists	Irbesartan, Valsartan, Candesartan	Blocking ROS production; inhibiting expression of vascular endothelial cells	(Yang et al., 2017)
ACE Inhibitors	Benazepril, Enalapril, Fosinopril, Lisinopril etc.	Increasing plasma bradykinin and vasodilates arterial lumen	(Yang et al., 2017)
PCSK9 Inhibitors	Evolocumab	Lower lipid levels in blood and prevent inflammatory symptoms	(Kumar et al., n.d.)
Table S1B: Recent Developments in Small Peptide Therapeutics in ACVD and Associated Disorders.
Category	Therapeutic Class	Mechanism of Action	Source	Peptide	Highest Evidence Level	Reference/Review
Therapeutic Peptides	Antihyperglycemic	Multifactorial protection in cardiac health	Indigenous/Recombinant	Glucagon-like peptide 1	Murine in-vivo	(Saraiva & Sposito, 2014)
	Antihyperlipidemic	Increased hepatic LDL clearance	Indigenous/Recombinant	Human Neutrophil Peptide 1	in-vitro	(Paulin et al., 2017)
	Anti-inflammatory	Inhibition of cytokine expression	Indigenous/Recombinant	Ac-SDKP	in-vitro	(Dadar et al., 2019)
	Anti-inflammatory	Inhibition of cytokine expression	Indigenous/Recombinant	IIIM1	in-vitro	(Dadar et al., 2019)
	Anti-inflammatory/Cardioprotective	Downregulation of pro-inflammatory pathways and atherosclerotic plaque regression	Indigenous/Recombinant	Cortistatin	Murine in-vivo	(Liang et al., 2019)
	Anti-inflammatory/Cardioprotective	Multifactorial protection in cardiac health	Indigenous/Recombinant	Natriuretic peptide (Atrial/B/C)	Human in-vivo/Clinical	(Volpe et al., 2014)
	Anti-inflammatory/Immunosuppressive	Immune suppression of T-cell activation and macrophage foaming	Indigenous/Recombinant	Vasoactive intestinal peptide	Murine in-vivo	(Benitez et al., 2018)
	Antioxidant	oxLDL-elicited ROS reduction	Indigenous/Recombinant	Humanin	Murine in-vivo	(Marleau et al., 2014)
	Anti-oxidant/Anti-inflammatory	Selectively lowered LOX product levels in serum	Indigenous/Recombinant	Carnosine	Murine in-vivo	(Gianazza et al., 2021)
	Immunosuppressive	Macrophage regulation	Indigenous/Recombinant	Neuropeptide Y (NPY)	in-vitro	(Dadar et al., 2019)
Synthetic Peptides	Antihyperglycemic	Increased blood HDL; augmented ROS and chlesterol efflux	Apolipoprotein A-I Mimetics	ELK-2A2K2E	Murine in-vivo	(Amaro et al., 2021; Ditiatkovski et al., 2013)
	Anti-inflammatory	TNF-α, IFN-γ, IL-6 and IL-1β reduction	Antimicrobila peptide hybrid	LL-37-Ta1	in-silico/murine in-vivo	(L. Zhang et al., 2021)
	Anti-inflammatory	Inhibition of TNF-α and IL-6	Designer Chensinin-1 Mutants	MC1-1/2/3	in-vitro/in-silico	(Dong et al., 2017)
	Anti-inflammatory	Inhibition of soy bean 15-LOX	Solid phase peptide synthesizer	FWY, FYS, YWG	in-vitro	(Somvanshi et al., 2008)
	Anti-inflammatory	Inhibition of 12-LOX	Solid phase peptide synthesizer	FWY, YWCS, FYS, FWCS	in-vitro	(A. kumar Singh et al., 2012a; Somvanshi et al., 2008)
	Anti-inflammatory	Inhibition of LPS-induced cytokine storm	Solid phase peptide synthesizer	MHP1	in-vitro	(la Manna et al., 2018)
	Anti-inflammatory	Reduced atherosclerotic lesion	Solid phase peptide synthesizer	Trp-His	Murine in-vivo	(Matsui et al., 2010)
	Anti-oxidant/Anti-inflammatory	Inhibition of NO production; suppressed immune activation	Solid phase peptide synthesizer	9Pbw2/9Pbw4/AIP6	in-vitro	(Dadar et al., 2019)
	Anti-oxidant/Anti-inflammatory	Antagonists of lipoxidation products	Solid phase peptide synthesizer	Oxpholipin 11D	in-vitro	(Dadar et al., 2019)
	Anti-thrombotic	Prothrombin inhibition	Arg-gly-asp mimetic	Eptifibatide	Human in-vivo/Clinical	Th1052
	Anti-thrombotic	Prothrombin inhibition	Hirudin mimetic	Bivalirudin	Human in-vivo/Clinical	Th1006
	Immunosuppressive	CD36 antagonist	GHRP anlaogue	EP 80317/Hexarelin	Murine in-vivo	(Marleau et al., 2014)
	Immunosuppressive	Suppression of chemotaxis and adhesion of PMBC	Solid phase peptide synthesizer	Chemerin 15	in-vitro	(Dadar et al., 2019)
	Immunosuppressive	Macrophage regulation	Solid phase peptide synthesizer	IDR-1018	in-vitro	(Dadar et al., 2019)
Natural/Dietary Peptides	Antihyperglycemic	Activation of PPARα; lowered glucose/TG levels	Glycine max	Soymorphin-5	Murine in-vivo	(Yamada et al., 2012)
	Antihyperlipidemic	Unexplored	Chicken bone collagen hydrolysates	Complex mixture	Murine in-vivo	(Zaky et al., 2022)
	Anti-inflammatory	Unexplored	Amaranthus hypochondriacus	Seed glutenin fragment 75	in-vitro	PPepDB_2355
	Anti-inflammatory	Unexplored	Annona montana	Cyclomontanin A/B/C/D; corytuberine; annomuricatin C	in-vitro	PPepDB_2465; (Dadar et al., 2019)
	Anti-inflammatory	Unexplored	Annona reticulata	Fanlizhicyclopeptide A/B	in-vitro	(Dadar et al., 2019)
	Anti-inflammatory	Multifactorial protection against inflammation	Apis mellifera	Melittin	Murine in-vivo	(Dadar et al., 2019)
	Anti-inflammatory	Unexplored	Dianthus superbus	Dianthin A/B	in-vitro	PPepDB_1869
	Anti-inflammatory	Inhibition of NOS and IL-1β	Gluten	Pyro-EL	in-vitro	(Dadar et al., 2019)
	Anti-inflammatory	Reduced ROS production; Inhibition of PTGS, iNOS, PGE2,	Glycine max	Lunasin	in-vitro	PPepDB_3617
	Anti-inflammatory	Reduced TNF-α, IL-6, IL-1β, IFN-γ and IL-17 level	Glycine max	PepT1	in-vitro	PPepDB_3680
	Anti-inflammatory	Unexplored	Heterometrus laoticus	Hetlaxin	Murine in-vivo	(Dadar et al., 2019)
	Anti-inflammatory	Unexplored	Lateolabrax maculatus	DAPAPPSQLEHIRAA, AADGPMKGILGY	in-vitro	(Chen et al., 2021)
	Anti-inflammatory	Reduced TNF-α, IFN-γ, IL-6 and IL-1β	Marine Streptomyces sp.	Cyclomarin C	Murine in-vivo	(Dadar et al., 2019)
	Anti-inflammatory	Reduced TNF-α, IL-1β and PGE2 level	Pennisetum glaucum	Complex Mixture	in-vitro	(He et al., 2022)
	Anti-inflammatory	Reduced ROS production; Inhibits PTGS, TNF-α, iNOS and IL-1β	Pyropia yezoensis	PPY1	in-vitro	(Lee et al., 2015)
	Anti-inflammatory	Inhibition of TNF/TNFR1 downstream targets	Sea snake extracts	Hydrostatin-SN1	in-vitro	(Dadar et al., 2019)
	Anti-inflammatory	Inhibition of MAPK and NF-κB activation	Tabanus sp.	Cecropin-TY1	in-vitro	(Wei et al., 2015)
	Anti-inflammatory	Reduced TNF-α, IFN-γ, IL-6 and IL-1β	Theonella swinhoei	Perthamides C/D	Murine in-vivo	(Dadar et al., 2019)
	Anti-inflammatory/Cardioprotective	Reduced ROS production; Inhibition of VCAM, iNOS; Increased PHGSx and SOD expression	Oryza sativa	GEQQQQPGM	Murine in-vivo	(Tong et al., 2017)
	Anti-inflammatory/Immunosuppressive	Unexplored	Annona squamosa	Cyclosquamosin A-F/I	in-vitro	PPepDB_2852
	Antioxidant	Free radical scavenging; Inhibition of lipoxide production	Brassica napus	Complex Mixture	in-vitro	(Chakrabarti et al., 2014)
	Antioxidant	Free radical scavenging; Inhibition of lipoxide production	Egg albumin	IRW, IQW	in-vitro	(Chakrabarti et al., 2014)
	Antioxidant	Free radical scavenging; Inhibition of lipoxide production	Oryza sativa	FRDEHKK	in-vitro	(Chakrabarti et al., 2014)
	Anti-oxidant/Anti-inflammatory	Reduced lipid deposition, ROS, macrophage accumulation, IL-1β and TNF-α levels	Kefir	Complex Mixture	in-vitro	(Tung et al., 2020)
	Anti-oxidant/Anti-inflammatory	Reduced ROS production; inhibits TNF-α, IL-6 and IL-1β	Lupin mutabilis	Complex Mixture	in-vitro	(Montserrat-de la Paz et al., 2021)
	Anti-oxidant/Anti-inflammatory	Reduced ROS production; inhibits TNF-α, IL-6 and IL-1β	Setaria italica	PFLF, IALLIPF	in-vitro	(Ji et al., 2020)
	Antioxidant/Anti-thrombotic	Free radical scavenging; inhibition of thrombin-induced platelet aggregation	Milk Protein	Casein/κ-casein/Lactoglobulin hydrolysates	in-vitro	(Marcone et al., 2017), (Bamdad et al., 2017)
	Anti-thrombotic	Unexplored	Amaranthus hypochondriacus	Seed glutenin fragment 3/59	in-vitro	PPepDB_2355
	Anti-thrombotic	Unexplored	Arachis hypogaea	Unnamed	in-vitro	(S. B. Zhang, 2016)
	Anti-thrombotic	Unexplored	Yogurt	Complex mixture	in-vitro	(Zaky et al., 2022)
	Cardioprotective	Vasorelaxation	Citrus natsudaidai	Cyclonatsudamine A	Murine in-vivo	PPepDB_2013
	Cardioprotective	Inhibition of PTGS-2; vasorelaxation	Leonurus japonicus	Cycloleonuripeptide D/E/F	Murine in-vivo	(Tehrani et al., 2021)
	Cardioprotective	Inhibition of PTGS-2; vasorelaxation	Stellaria dichotoma	Dichotomin D/F/G	Murine in-vivo	(Tehrani et al., 2021)
	Cardioprotective	Vasorelaxation	Undaria pinnatifida	ACEi WH	Murine in-vivo	PPepDB_2957
	Cardioprotective	Vasorelaxation	Vaccaria hispanica	Segetalin F	Murine in-vivo	PPepDB_1677
	Immunosuppressive	Unexplored	Jatropha curcas	Curcacycline A/B	in-vitro	PPepDB_1758
	Immunosuppressive	Unexplored	Leonurus japonicus	Cycloleonurinin	in-vitro	PPepDB_1897
	Immunosuppressive	Unexplored	Linum usitatissimum	Cyclolinopeptide A-I	in-vitro	PPepDB_1864
References
Amaro, A. B., Curco, A. S., Garcia, E., Julve, J., Rives, J., Benitez, S., & Cortes, V. L. (2021). Apolipoprotein and LRP1-Based Peptides as New Therapeutic Tools in Atherosclerosis. Journal of Clinical Medicine 2021, Vol. 10, Page 3571, 10(16), 3571. https://doi.org/10.3390/JCM10163571
Bamdad, F., Bark, S., Kwon, C. H., Suh, J. W., & Sunwoo, H. (2017). Anti-Inflammatory and Antioxidant Properties of Peptides Released from β-Lactoglobulin by High Hydrostatic Pressure-Assisted Enzymatic Hydrolysis. Molecules : A Journal of Synthetic Chemistry and Natural Product Chemistry, 22(6). https://doi.org/10.3390/MOLECULES22060949
Benitez, R., Delgado-Maroto, V., Caro, M., Forte-Lago, I., Duran-Prado, M., O’Valle, F., Lichtman, A. H., Gonzalez-Rey, E., & Delgado, M. (2018). Vasoactive Intestinal Peptide Ameliorates Acute Myocarditis and Atherosclerosis by Regulating Inflammatory and Autoimmune Responses. The Journal of Immunology, 200(11), 3697–3710. https://doi.org/10.4049/JIMMUNOL.1800122
Chakrabarti, S., Jahandideh, F., & Wu, J. (2014). Food-derived bioactive peptides on inflammation and oxidative stress. BioMed Research International, 2014. https://doi.org/10.1155/2014/608979
Chen, J., Bai, W., Cai, D., Yu, Z., & Xu, B. (2021). Characterization and identification of novel anti-inflammatory peptides from Baijiao sea bass (Lateolabrax maculatus). LWT, 147, 111521. https://doi.org/10.1016/J.LWT.2021.111521
Dadar, M., Shahali, Y., Chakraborty, S., Prasad, M., Tahoori, F., Tiwari, R., & Dhama, K. (2019). Antiinflammatory peptides: current knowledge and promising prospects. Inflammation Research, 68(2), 125–145. https://doi.org/10.1007/S00011-018-1208-X
Ditiatkovski, M., D’Souza, W., Kesani, R., Chin-Dusting, J., de Haan, J. B., Remaley, A., & Sviridov, D. (2013). An Apolipoprotein A-I Mimetic Peptide Designed with a Reductionist Approach Stimulates Reverse Cholesterol Transport and Reduces Atherosclerosis in Mice. PLOS ONE, 8(7), e68802. https://doi.org/10.1371/JOURNAL.PONE.0068802
Dong, W., Mao, X., Guan, Y., Kang, Y., & Shang, D. (2017). Antimicrobial and anti-inflammatory activities of three chensinin-1 peptides containing mutation of glycine and histidine residues. Scientific Reports 2017 7:1, 7(1), 1–13. https://doi.org/10.1038/srep40228
Gianazza, E., Brioschi, M., Martinez Fernandez, A., Casalnuovo, F., Altomare, A., Aldini, G., & Banfi, C. (2021). Lipid Peroxidation in Atherosclerotic Cardiovascular Diseases. Antioxidants and Redox Signaling, 34(1), 49–98. https://doi.org/10.1089/ars.2019.7955
He, R., Liu, M., Zou, Z., Wang, M., Wang, Z., Ju, X., & Hao, G. (2022). Anti-inflammatory activity of peptides derived from millet bran in vitro and in vivo. Food & Function. https://doi.org/10.1039/D1FO03711K
Ito, F., Sono, Y., & Ito, T. (2019). Measurement and clinical significance of lipid peroxidation as a biomarker of oxidative stress: Oxidative stress in diabetes, atherosclerosis, and chronic inflammation. Antioxidants, 8(3). https://doi.org/10.3390/antiox8030072
Jamkhande, P. G., Chandak, P. G., Dhawale, S. C., Barde, S. R., Tidke, P. S., & Sakhare, R. S. (2014). Therapeutic approaches to drug targets in atherosclerosis Production and hosting by Elsevier. Saudi Pharmaceutical Journal, 22, 179–190. https://doi.org/10.1016/j.jsps.2013.04.005
Ji, Z., Mao, J., Chen, S., & Mao, J. (2020). Antioxidant and anti-inflammatory activity of peptides from foxtail millet (Setaria italica) prolamins in HaCaT cells and RAW264.7 murine macrophages. Food Bioscience, 36. https://doi.org/10.1016/J.FBIO.2020.100636
Kumar, K., Shair, G., Ranjodh, A., & Sanghera, S. (n.d.). Pharmacological Options in Atherosclerosis: A Review of the Existing Evidence. https://doi.org/10.6084/m9.figshare.7371020
la Manna, S., di Natale, C., Florio, D., & Marasco, D. (2018). Peptides as Therapeutic Agents for Inflammatory-Related Diseases. International Journal of Molecular Sciences, 19(9). https://doi.org/10.3390/IJMS19092714
Lee, H. A., Kim, I. H., & Nam, T. J. (2015). Bioactive peptide from Pyropia yezoensis and its anti-inflammatory activities. International Journal of Molecular Medicine, 36(6), 1701–1706. https://doi.org/10.3892/IJMM.2015.2386/HTML
Liang, J., Bai, Y., Chen, W., Fu, Y., Liu, Y., & Yin, X. (2019). Cortistatin, a novel cardiovascular protective peptide. Cardiovascular Diagnosis and Therapy, 9(4), 394–399. https://doi.org/10.21037/CDT.2018.12.08
Libby, P. (2021). The changing landscape of atherosclerosis. In Nature (Vol. 592, Issue 7855, pp. 524–533). Nature Research. https://doi.org/10.1038/s41586-021-03392-8
Libby, P., Buring, J. E., Badimon, L., Hansson, G. K., Deanfield, J., Bittencourt, M. S., Tokgözoğlu, L., & Lewis, E. F. (2019). Atherosclerosis. Nature Reviews Disease Primers, 5(1). https://doi.org/10.1038/s41572-019-0106-z
Marcone, S., Belton, O., & Fitzgerald, D. J. (2017). Milk-derived bioactive peptides and their health promoting effects: a potential role in atherosclerosis. British Journal of Clinical Pharmacology, 83(1), 152–162. https://doi.org/10.1111/BCP.13002
Marleau, S., Mellal, K., Huynh, D. N., & Ong, H. (2014). Potential peptides in atherosclerosis therapy. Cardiovascular Issues in Endocrinology, 43, 93–106. https://doi.org/10.1159/000360568
Matsui, T., Sato, M., Tanaka, M., Yamada, Y., Watanabe, S., Fujimoto, Y., Imaizumi, K., & Matsumoto, K. (2010). Vasodilating dipeptide Trp-His can prevent atherosclerosis in apo E-deficient mice. British Journal of Nutrition, 103(3), 309–313. https://doi.org/10.1017/S0007114509991814
Montserrat-de la Paz, S., Villanueva, A., Pedroche, J., Millan, F., Martin, M. E., & Millan-Linares, M. C. (2021). Antioxidant and Anti-Inflammatory Properties of Bioavailable Protein Hydrolysates from Lupin-Derived Agri-Waste. Biomolecules, 11(10). https://doi.org/10.3390/BIOM11101458
Paulin, N., Döring, Y., Kooijman, S., Blanchet, X., Viola, J. R., de Jong, R., Mandl, M., Hendrikse, J., Schiener, M., von Hundelshausen, P., Vogt, A., Weber, C., Bdeir, K., Hofmann, S. M., Rensen, P. C. N., Drechsler, M., & Soehnlein, O. (2017). Human Neutrophil Peptide 1 Limits Hypercholesterolemia-induced Atherosclerosis by Increasing Hepatic LDL Clearance. EBioMedicine, 16, 204–211. https://d…
Rafieian-Kopaei, M., Setorki, M., Doudi, M., Baradaran, A., & Nasri, H. (2014). Atherosclerosis: Process, Indicators, Risk Factors and New Hopes. In International Journal of Preventive Medicine (Vol. 5, Issue 8). www.ijpm.ir
Saraiva, F. K., & Sposito, A. C. (2014). Cardiovascular effects of Glucagon-like peptide 1 (GLP-1) receptor agonists. Cardiovascular Diabetology, 13(1), 1–11. https://doi.org/10.1186/S12933-014-0142-7/TABLES/3
Singh, A. kumar, Singh, R., Naz, F., Chauhan, S. S., Dinda, A., Shukla, A. A., Gill, K., Kapoor, V., & Dey, S. (2012). Structure Based Design and Synthesis of Peptide Inhibitor of Human LOX-12: In Vitro and In Vivo Analysis of a Novel Therapeutic Agent for Breast Cancer. PLOS ONE, 7(2), e32521. https://doi.org/10.1371/JOURNAL.PONE.0032521
Sobenin, I. A., Sazonova, M. A., Postnov, A. Y., Salonen, J. T., Bobryshev, Y. v., & Orekhov, A. N. (2013). Association of Mitochondrial Genetic Variation with Carotid Atherosclerosis. PLOS ONE, 8(7), e68070. https://doi.org/10.1371/JOURNAL.PONE.0068070
Soehnlein, O., & Libby, P. (2021). Targeting inflammation in atherosclerosis — from experimental insights to the clinic. Nature Reviews Drug Discovery 2021 20:8, 20(8), 589–610. https://doi.org/10.1038/s41573-021-00198-1
Somvanshi, R. K., Singh, A. K., Saxena, M., Mishra, B., & Dey, S. (2008). Development of novel peptide inhibitor of Lipoxygenase based on biochemical and BIAcore evidences. Biochimica et Biophysica Acta, 1784(11), 1812–1817. https://doi.org/10.1016/J.BBAPAP.2008.07.004
Tehrani, M. H. H., Gholibeikian, M., Bamoniri, A., & Mirjalili, B. B. F. (2021). Cancer Treatment by Caryophyllaceae-Type Cyclopeptides. Frontiers in Endocrinology, 11, 992. https://doi.org/10.3389/FENDO.2020.600856/BIBTEX
Tong, L. T., Ju, Z., Qiu, J., Wang, L., Liu, L., Zhou, X., & Zhou, S. (2017). Peptide GEQQQQPGM derived from rice α-globulin reduces the risk of atherosclerosis in hamsters by improving vascular endothelial cells injury. RSC Advances, 7(78), 49194–49203. https://doi.org/10.1039/C7RA08304A
Tung, M. C., Lan, Y. W., Li, H. H., Chen, H. L., Chen, S. Y., Chen, Y. H., Lin, C. C., Tu, M. Y., & Chen, C. M. (2020). Kefir peptides alleviate high-fat diet-induced atherosclerosis by attenuating macrophage accumulation and oxidative stress in ApoE knockout mice. Scientific Reports, 10(1). https://doi.org/10.1038/S41598-020-65782-8
Volpe, M., Rubattu, S., & Burnett, J. (2014). Natriuretic peptides in cardiovascular diseases: current use and perspectives. European Heart Journal, 35(7), 419–425. https://doi.org/10.1093/EURHEARTJ/EHT466
Wang, J., Chen, H., Liu, Y., Zhou, W., Sun, R., & Xia, M. (2015). Retinol binding protein 4 induces mitochondrial dysfunction and vascular oxidative damage. Atherosclerosis, 240(2), 335–344. https://doi.org/10.1016/J.ATHEROSCLEROSIS.2015.03.036
Wei, L., Huang, C., Yang, H., Li, M., Yang, J., Qiao, X., Mu, L., Xiong, F., Wu, J., & Xu, W. (2015). A potent anti-inflammatory peptide from the salivary glands of horsefly. Parasites and Vectors, 8(1), 1–13. https://doi.org/10.1186/S13071-015-1149-Y/FIGURES/7
Yamada, Y., Muraki, A., Oie, M., Kanegawa, N., Oda, A., Sawashi, Y., Kaneko, K., Yoshikawa, M., Goto, T., Takahashi, N., Kawada, T., & Ohinata, K. (2012). Soymorphin-5, a soy-derived μ-opioid peptide, decreases glucose and triglyceride levels through activating adiponectin and PPARα systems in diabetic KKAy mice. American Journal of Physiology. Endocrinology and Metabolism, 302(4). https://doi.or…
Yang, X., Li, Y., Li, Y., Ren, X., Zhang, X., Hu, D., Gao, Y., Xing, Y., & Shang, H. (2017). Oxidative stress-mediated atherosclerosis: Mechanisms and therapies. In Frontiers in Physiology (Vol. 8, Issue AUG). Frontiers Media S.A. https://doi.org/10.3389/fphys.2017.00600
Zaky, A. A., Simal-Gandara, J., Eun, J.-B., Shim, J.-H., & Abd El-Aty, A. M. (2022). Bioactivities, Applications, Safety, and Health Benefits of Bioactive Peptides From Food and By-Products: A Review. Frontiers in Nutrition, 0, 1354. https://doi.org/10.3389/FNUT.2021.815640
Zhang, L., Wei, X., Zhang, R., Mozdziak, P. E., Si, D., Ahmad, B., Cheng, Q., & Tong, Y. (2021). Design and Immunological Evaluation of a Hybrid Peptide as a Potent TLR2 Agonist by Structure-Based Virtual Screening. Frontiers in Cell and Developmental Biology, 9. https://doi.org/10.3389/FCELL.2021.620370
Zhang, S. B. (2016). In vitro antithrombotic activities of peanut protein hydrolysates. Food Chemistry, 202, 1–8. https://doi.org/10.1016/J.FOODCHEM.2016.01.108
Zielinski, Z. A. M., & Pratt, D. A. (2017). Lipid Peroxidation: Kinetics, Mechanisms, and Products. Journal of Organic Chemistry, 82(6), 2817–2825. https://doi.org/10.1021/acs.joc.7b00152

## Sheet: Table S2
Table S2: Total Protein Content of Sample Fruits (Crude) Inferred from Bradford Assay Results
Protein Quantity (Crude)	BARI Lebu-1 Peel	BARI Lebu-1 Pulp	BARI Lebu-2 Peel	BARI Lebu-2 Pulp	BARI Lebu-3 Peel	BARI Lebu-3 Pulp	BARI Malta-1 Peel	BARI Malta-1 Pulp	CxL Hybrid Peel	CxL Hybrid Pulp	Gandharaj Peel	Gandharaj Pulp	Jara Lebu Peel	Jara Lebu Pulp
per mL (ug)	152.29	163.79	161.11	110.43	122.1	117.61	182.46	187.26	176.54	108.09	112.34	112.96	162.09	161.19
in 50mL (mg)	7.61	8.19	8.06	5.52	6.11	5.88	9.12	9.36	8.83	5.4	5.62	5.65	8.1	8.06
per g (mg)	3.81	4.09	4.03	2.76	3.05	2.94	4.56	4.68	4.41	2.7	2.81	2.82	4.05	4.03
in 100g (mg)	380.72	409.48	402.79	276.08	305.26	294.03	456.14	468.15	441.34	270.22	280.86	282.41	405.22	402.98
Protein Quantity (Crude)	Nagpur Peel	Nagpur Pulp	Pati Lebu Peel	Pati Lebu Pulp	PAU Kinnow-1 Peel	PAU Kinnow-1 Pulp	Pummelo Peel	Pummelo Pulp	Rangpur Peel	Rangpur Pulp	Satkara Lebu Peel	Satkara Lebu Pulp	Sharbati Peel	Sharbati Pulp
per mL (ug)	175.45	175.76	180.11	165.78	141.15	161.43	138.86	131.7	142.9	132.45	171.83	171	159.62	154.27
in 50mL (mg)	8.77	8.79	9.01	8.29	7.06	8.07	6.94	6.58	7.15	6.62	8.59	8.55	7.98	7.71
per g (mg)	4.39	4.39	4.5	4.14	3.53	4.04	3.47	3.29	3.57	3.31	4.3	4.27	3.99	3.86
in 100g	438.63	439.39	450.27	414.46	352.87	403.58	347.15	329.24	357.26	331.12	429.58	427.49	399.05	385.66

## Sheet: Table S3
Table S3: Protein Purification Parameter Values
	BARI Lebu-1 Peel	BARI Lebu-1 Pulp	BARI Lebu-2 Peel	BARI Lebu-2 Pulp	BARI Lebu-3 Peel	BARI Lebu-3 Pulp	BARI Malta-1 Peel	BARI Malta-1 Pulp	CxL Hybrid Peel	CxL Hybrid Pulp	Gandharaj Peel	Gandharaj Pulp	Jara Lebu Peel	Jara Lebu Pulp	Nagpur Peel	Nagpur Pulp	Pati Lebu Peel	Pati Lebu Pulp	PAU Kinnow-1 Peel	PAU Kinnow-1 Pulp	Pummelo Peel	Pummelo Pulp	Rangpur Peel	Rangpur Pulp	Satkara Lebu Peel	Satkara Lebu Pulp	Sharbati Peel	Sharbati Pulp
Total Protein Content
Crude	152.289	163.794	161.115	110.43	122.103	117.612	182.458	187.26	176.536	108.089	112.344	112.964	162.089	161.19	175.451	175.757	180.107	165.782	141.149	161.431	138.862	131.697	142.902	132.449	171.832	170.998	159.619	154.265
Extraction	2740.57	2791.22	2645.4	1426.98	1452.85	1390	4820.22	4812.72	4809.96	851.459	842.216	844.383	2016.18	2101.17	2065.27	3180.27	3182.49	3212.92	2100.91	3201.07	1519.4	2096.83	1705	1835.28	2223.14	3400.87	2227.18	1531.18
Acetone Precipitation 1	2823.65	2913	2961.26	1542.3	1564.24	1552.7	4911.72	4876.22	4825.75	956.628	941.314	1011.83	2179.01	2201.81	2194.68	3291.96	3327.74	3256.47	2433.46	3446.12	1722.67	2134.54	1992.01	2082.62	2546.89	3575.68	2494.16	1604.6
Acetone Precipitation 2	2857.72	2911.34	2825.14	1552.38	1522.79	1486.08	4901.68	4985.29	4826.35	1025.83	1021.89	945.803	2184.3	2105.86	2293.26	3310.4	3295.72	3266.27	2656.12	3828.75	2086.3	2499.77	2343.61	2169.7	2771.34	3637.98	2683.68	1935.65
TCA Precipitation 1	2711.21	2677.83	2639.14	1417.1	1394.04	1279.58	4684.84	4809.57	4647.21	831.23	785.679	832.305	1952.6	1923.15	2115.74	3175.16	3194.33	3111.74	2553.82	3509.98	1737.43	2341.87	2089.65	1895.3	2440.42	3241.2	2516.98	1824.02
2xEtOH Wash 1	2282.77	2254.61	2133.03	916.907	853.111	868.706	4155.46	4403.56	4121.84	386.287	283.302	383.418	1418.42	1397.8	1598.51	2701.59	2700.62	2691.68	2199.98	3057.35	1336.72	1943.58	1605.4	1500.6	1946.62	2813.6	2049.46	1340.22
2xAcetone Precipitation	2271.54	2225.08	2165.01	1017.3	908.738	839.102	4034.29	4435.14	4209.62	412.41	210.679	277.556	1308.7	1493.65	1508.47	2628.73	2702.35	2624.53	1852.65	2586.89	973.016	1614.66	1146.57	1135.36	1516.87	2340.14	1573.13	980.026
2xEtOH Wash 2	2258.24	2295.52	2194.9	1069.12	890.296	847.649	4010.08	4478.95	4237.31	398.152	278.188	247.25	1376.45	1565.26	1531.56	2638.67	2766.49	2711.4	1450.73	2275.4	655.684	1115.97	735.384	698.754	1098.24	1843.1	1129.94	668.736
Total Phenolic Content
Crude	150.486	77.5695	129.445	62.4129	130.079	100.826	134.448	89.6405	140.079	69.5938	135.162	58.3817	135.702	57.961	127.759	83.7224	141.992	109.455	149.407	77.2891	141.436	73.121	146.768	96.2924	153.981	108.788	151.764	105.243
Extraction	134.418	54.3163	112.862	57.4944	115.183	95.0597	125.41	69.9295	129.357	46.1374	111.415	45.9451	122.829	36.2598	112.996	61.5688	121.095	100.028	125.186	61.2896	132.911	48.3402	124.901	87.7457	134.317	101.681	130.783	92.4648
Acetone Precipitation 1	92.3407	11.8685	64.1374	13.9443	60.0148	46.7521	67.3864	14.4765	87.4125	11.8588	60.4082	2.8457	73.8707	18.3819	56.9757	6.8772	80.5976	58.2616	79.8709	2.4524	77.6254	3.6182	70.6093	40.6748	75.6331	43.1537	82.6608	45.1576
Acetone Precipitation 2	30.8352	3.1277	21.1731	4.5952	20.4147	15.6661	22.9806	4.5421	29.1192	3.7509	20.0824	0.6476	24.6902	6.3957	18.6367	2.5152	26.1773	19.5896	26.5981	0.8078	25.4744	1.6389	23.0939	13.2396	25.7299	14.9524	27.8967	15.4125
TCA Precipitation 1	10.2331	1.5362	7.8284	1.0558	6.2336	5.3098	7.3854	1.9585	9.004	1.9081	6.6595	0.3163	8.3138	2.0204	6.5823	0.215	8.9044	6.946	8.2244	0.2721	8.0369	0.7607	7.6169	4.4197	8.7456	4.6953	9.4502	5.0488
2xEtOH Wash 1	3.2814	0.6145	2.1586	0.757	2.3579	1.0573	2.101	0.6271	3.5481	0.2989	2.8333	0.9665	2.1848	0.7255	2.3107	0.466	2.1862	2.6751	2.134	0.8344	2.2425	0.4692	2.3565	1.3305	2.4209	1.7604	3.5952	1.0491
2xAcetone Precipitation	1.1758	0.345	0.3252	0.8875	0.93	0.9764	0.947	0.395	1.3242	0.9093	0.6651	0.6484	0.4728	0.294	0.2163	0.793	0.4895	0.5928	0.9765	0.9888	0.6946	0.7369	0.9812	0.9221	0.1388	0.8981	1.2629	0.613
2xEtOH Wash 2	0.7925	0.5304	0.7441	0.3463	0.3458	0.9481	0.7189	0.5876	0.8328	0.8301	0.0901	0.7181	0.4636	0.1027	0.0691	0.8396	0.2649	0.2205	0.9893	0.6601	0.3729	0.1418	0.4177	0.723	0.8659	0.1728	0.8481	0.4608
Nucleic Acid Content
Crude	58.4762	69.896	62.7217	62.5643	69.0263	40.5337	45.8571	60.8599	37.483	51.8971	58.471	41.6523	35.461	51.1945	49.1843	38.2677	31.3081	73.693	52.4774	41.2784	63.8388	35.0541	42.2772	37.9977	54.0123	34.7794	79.7706	72.8911
Extraction	23.7247	24.5268	22.171	38.456	35.5602	20.1993	37.6573	39.4203	33.0056	37.1303	39.0543	32.5069	21.2851	21.5847	26.2047	38.6372	29.362	27.8214	24.0532	24.4384	35.7248	22.8973	22.8889	33.429	40.3122	38.6166	26.1874	33.8521
Acetone Precipitation 1	10.578	5.4646	9.0366	9.4508	6.176	6.2328	8.3686	5.8451	10.4834	5.1877	8.2579	8.2074	9.5734	8.5576	8.4216	8.8372	10.3193	9.2844	7.1065	9.3795	6.3383	5.1879	9.2611	10.8275	7.9863	5.3568	7.5439	5.6888
Acetone Precipitation 2	3.3098	1.46	3.6039	3.1925	2.2689	2.3074	2.4055	1.6193	3.4913	1.0572	2.6001	2.9049	3.4673	2.3846	2.1824	2.5656	3.0092	3.4336	2.9522	3.5788	2.2075	1.9163	3.6671	3.3937	2.3444	1.9354	2.4865	1.1999
TCA Precipitation 1	1.7409	0.8367	1.7774	1.4807	0.4727	0.7499	0.4548	0.661	1.9082	0.8969	0.692	0.4384	1.6727	0.6137	0.4627	0.5351	1.5653	1.2275	0.968	1.7579	0.3142	0.8721	1.2517	1.2718	0.9862	0.9016	0.6963	0.6019
2xEtOH Wash 1	0.4954	0.0753	0.0993	0.9615	0.4527	0.7086	0.8659	0.4871	0.2823	0.4157	0.8943	0.8134	0.5443	0.321	0.9617	0.9574	0.6194	0.9256	0.1329	0.4542	0.9369	0.5667	0.593	0.8355	0.4511	0.3247	0.8006	0.957
2xAcetone Precipitation	0.6572	0.3682	0.4563	0.9384	0.0267	0.0302	0.1071	0.3854	0.9616	0.0918	0.7191	0.6317	0.3821	0.2715	0.0867	0.4875	0.1896	0.1478	0.6909	0.0319	0.3307	0.3729	0.0927	0.3885	0.1097	0.5511	0.1612	0.5212
2xEtOH Wash 2	0.7894	0.2581	0.0689	0.7607	0.0945	0.1961	0.341	0.4696	0.0382	0.5348	0.1398	0.1031	0.0996	0.0999	0.1987	0.5018	0.5788	0.6027	0.2541	0.35	0.063	0.2993	0.4414	0.7923	0.3721	0.7957	0.3297	0.4382
260/280 Ratio
Crude	2.42603	2.43102	2.14504	2.13204	2.84103	2.12704	2.23704	2.33903	2.54702	2.34605	2.14503	2.43304	1.94204	2.63303	2.52503	2.13504	1.53903	2.13204	2.32603	2.34404	2.24504	2.03702	2.84505	2.04204	2.34903	2.23704	2.53904	2.03303
Extraction	2.02103	2.12502	1.63603	1.93003	2.33503	1.72404	1.83103	2.03103	2.13902	1.93704	1.93703	2.13003	1.73404	2.13103	2.02203	1.73003	1.33303	1.72503	1.92003	1.94003	1.83703	1.83402	2.34004	1.83904	1.94003	1.83403	2.03804	1.72602
Acetone Precipitation 1	1.21602	1.41101	1.13103	1.41303	1.72502	1.21703	1.22202	1.42202	1.53102	1.32903	1.22302	1.62102	1.22102	1.31602	1.21902	1.31803	0.916026	1.11502	1.31902	1.12402	1.32803	1.11801	1.52903	1.12703	1.42402	1.12502	1.33303	0.921016
Acetone Precipitation 2	1.16552	1.06901	0.817522	1.01252	1.19001	0.886018	0.860518	1.01501	1.01951	1.07202	0.902013	1.12752	0.860518	0.980516	0.885011	0.934019	0.632521	0.72402	0.852019	0.771012	0.902516	0.889506	1.09152	0.77802	1.04702	0.771018	0.923517	0.650011
TCA Precipitation 1	1.31502	0.877	0.634015	0.842011	0.885009	0.685007	0.649013	0.778006	0.678006	0.915014	0.781007	0.834006	0.790011	0.795009	0.751005	0.800013	0.629015	0.573015	0.605013	0.608004	0.697006	0.871001	0.884015	0.639007	0.850012	0.577013	0.724009	0.659007
2xEtOH Wash 1	0.914012	0.747	0.584015	0.702011	0.785009	0.605007	0.549013	0.668006	0.588006	0.865014	0.681007	0.694006	0.630011	0.715009	0.651005	0.640013	0.469015	0.403015	0.505013	0.538004	0.557006	0.741001	0.704015	0.599007	0.750012	0.457013	0.644009	0.469007
2xAcetone Precipitation	0.609007	0.807	0.614015	0.802011	0.815009	0.705007	0.609013	0.808006	0.708006	0.915014	0.711007	0.804006	0.710011	0.805009	0.711005	0.710013	0.509015	0.503015	0.605013	0.608004	0.607006	0.811001	0.814015	0.709007	0.810012	0.507013	0.814009	0.509007
2xEtOH Wash 2	0.606007	0.802	0.609009	0.800009	0.809008	0.603007	0.705007	0.700002	0.701003	0.807006	0.708005	0.702001	0.702003	0.801007	0.707003	0.605004	0.603006	0.601008	0.602007	0.608	0.603003	0.808001	0.809006	0.704005	0.804007	0.604005	0.708004	0.607006

## Sheet: Table S4
Table S4: Antioxidant Assay Parameter Values
DPPH Free Radical Scavenging Assay (%SA)
Conc	Nagpur Pulp	Nagpur Peel	Rangpur Pulp	Rangpur Pulp	BARI Lebu-1 Pulp	BARI Lebu-1 Peel	BARI Lebu-2 Pulp	BARI Lebu-2 Peel	BARI Lebu-3 Pulp	BARI Lebu-3 Peel	CxL Hybrid Pulp	CxL Hybrid Peel	PAU Kinnow-1 Pulp	PAU Kinnow-1 Peel	Pati Lebu Pulp	Pati Lebu Peel	Jara Lebu Pulp	Jara Lebu Peel	Pummelo Pulp	Pummelo Peel	Gandharaj Pulp	Gandharaj Peel	Sharbati Pulp	Sharbati Peel	Satkara Pulp	Satkara Peel	BARI Malta-1 Pulp	BARI Malta-1 Peel	Quercetin
400	61.15±1.47	43.13±0.23	50.31±0.64	47.23±1.05	80.17±0.19	39.98±0.5	46.92±0.79	80.3±1.57	44.98±1.98	51.07±0.72	33.58±0.85	35.18±0.46	51.98±1.33	46.6±0.7	41.01±3.1	53.92±1.02	54.8±1.32	24.28±3.09	49.21±2.15	22.58±3.49	82.76±0.57	47.8±0.49	53.15±0.95	50.68±0.32	49.73±0.76	42.1±0.6	49.22±0.29	27.82±2.8	92.14±4.01
200	44.89±0.74	30.47±0.71	38.29±0.92	31.42±0.34	62.22±0.66	25.25±2.72	32.43±2.76	65.76±3.27	32.54±1.7	35.42±2.1	15.04±0.41	20.13±1.33	37.22±1.93	30.63±1.94	26.17±3.39	40.15±3.08	38.4±1.63	8.7±3.46	35.82±1.89	11.38±3.31	67.31±1.44	35.61±1.22	37.52±1.29	36.01±2.11	32.15±1.65	28.92±1.89	37.99±0.52	13.48±2.09	72.51±4.26
100	37.79±0.31	20.19±1.15	30.2±2.97	26.61±2.46	60.23±0.64	20.05±1.86	26.87±1.15	60.6±1.02	22.92±3.12	26.92±1.74	14.38±2.46	16.52±1.02	28.91±0.64	24.03±0.44	19.88±1.75	31.01±2.76	30.87±1.71	4±1.88	25.68±1.17	2.2±3.08	58.82±2.88	26.67±2.05	29.67±3.38	27.43±0.85	25.52±1.05	22.73±1.72	26.18±2.13	7.69±2.27	54.69±1.41
50	21.18±0.58	11.33±0.17	15.69±0.63	13.49±0.36	29.73±0.38	9.53±0.16	11.8±0.47	29.17±0.51	10.89±0.76	14.74±0.74	5.94±0.22	6.88±1	15.99±1.37	11.79±0.43	12.27±1.48	15.08±1.53	16.81±1.92	2.93±1.44	13.35±1.31	0.31±2.49	30.45±0.91	12.82±0.41	16.43±1.34	14.47±1.02	16.06±0.99	11.82±0.36	13.45±0.68	5.34±1.16	33.14±1.53
25	15.69±0.83	7.61±0.77	11.01±0.62	10.08±1.37	22.12±0.54	7.43±0.51	9.45±0.7	21.06±0.71	8.83±1.14	11.93±0.18	5.45±0.62	5.42±0.69	10.23±0.77	9.61±0.34	6.1±1	13.23±0.93	11.58±0.2	0.56±1.89	9.6±0.73	1.38±1.86	23.37±1.35	9±0.4	12.35±0.96	10.09±0.57	10.67±0.37	7.63±0.64	10.39±0.04	3.6±0.47	22.85±1.61
H2O2 Free Radical Scavenging Assay (%SA)
Conc	Jara Lebu Peel	Pummelo Peel	CxL Hybrid Pulp	BARI Malta-1 Peel	Pati Lebu Pulp	Nagpur Peel	BARI Lebu-1 Peel	CxL Hybrid Peel	Satkara Lebu Peel	Satkara Lebu Pulp	Rangpur Peel	BARI Lebu-2 Pulp	Rangpur Pulp	Gandharaj Peel	Pummelo Pulp	BARI Malta-1 Pulp	BARI Lebu-3 Peel	PAU Kinnow-1 Peel	PAU Kinnow-1 Pulp	Sharbati Peel	Sharbati Pulp	BARI Lebu-3 Pulp	Jara Lebu Pulp	Pati Lebu Peel	Nagpur Pulp	Gandharaj Pulp	BARI Lebu-1 Pulp	BARI Lebu-2 Peel	Quercetin
400	20.17±2.86	19.91±4.53	27.14±2.52	45.48±7.4	35.08±3.42	39.83±4.97	34.75±4.97	34.41±7.82	45.15±2.6	40.9±3.77	44.64±3.42	46.54±3.72	51.49±5.72	48.5±2.33	42.28±5.85	49.97±2.14	46.74±4.65	56.83±8.43	42.38±6.24	54.4±5.03	48.57±2.47	55.37±4.18	49.57±3.24	59.81±1.37	61.03±1.46	84.2±4.46	78.59±2.82	86.74±4.55	95.02±1.52
200	15.24±2.16	15.04±3.42	20.5±1.9	34.36±5.59	26.5±2.59	30.09±3.75	26.26±3.76	25.99±5.91	34.11±1.97	30.9±2.85	33.72±2.58	35.16±2.81	38.9±4.32	36.64±1.76	31.94±4.42	37.75±1.62	35.31±3.51	42.93±6.37	32.02±4.71	41.1±3.8	36.69±1.87	41.83±3.16	37.45±2.45	45.19±1.04	46.11±1.1	63.61±3.37	59.38±2.13	65.53±3.44	71.79±1.15
100	11.51±1.63	11.36±2.58	15.49±1.43	25.96±4.22	20.02±1.95	22.73±2.83	19.84±2.84	19.64±4.46	25.77±1.48	23.35±2.15	25.48±1.95	26.57±2.12	29.39±3.27	27.69±1.33	24.13±3.34	28.52±1.22	26.68±2.65	32.44±4.81	24.19±3.56	31.05±2.87	27.72±1.41	31.6±2.38	28.29±1.85	34.14±0.78	34.84±0.83	48.06±2.55	44.86±1.61	49.51±2.6	54.24±0.87
50	8.7±1.23	8.58±1.95	11.7±1.08	19.61±3.19	15.13±1.47	17.18±2.14	14.99±2.14	14.84±3.37	19.47±1.12	17.64±1.62	19.25±1.47	20.07±1.6	22.2±2.47	20.92±1	18.23±2.52	21.55±0.92	20.15±2	24.51±3.63	18.28±2.69	23.46±2.17	20.94±1.06	23.88±1.8	21.37±1.39	25.8±0.59	26.32±0.63	36.31±1.92	33.89±1.21	37.41±1.96	40.98±0.65
25	6.57±0.93	6.48±1.47	8.84±0.82	14.82±2.41	11.43±1.11	12.98±1.62	11.32±1.62	11.21±2.55	14.71±0.84	13.32±1.22	14.54±1.11	15.16±1.21	16.77±1.86	15.8±0.76	13.77±1.9	16.28±0.69	15.23±1.51	18.52±2.74	13.81±2.03	17.72±1.63	15.82±0.8	18.04±1.36	16.15±1.05	19.49±0.44	19.88±0.47	27.43±1.45	25.61±0.91	28.26±1.48	30.96±0.49
Reducing Power Assay (%Red)
Conc	Pummelo Peel	Jara Lebu Peel	CxL Hybrid Pulp	CxL Hybrid Peel	BARI Lebu-1 Peel	Pati Lebu Pulp	Nagpur Peel	Satkara Lebu Pulp	PAU Kinnow-1 Pulp	Pummelo Pulp	BARI Malta-1 Peel	Rangpur Peel	Satkara Lebu Peel	BARI Lebu-3 Peel	BARI Lebu-2 Pulp	Gandharaj Peel	Sharbati Pulp	Jara Lebu Pulp	BARI Malta-1 Pulp	Rangpur Pulp	Sharbati Peel	BARI Lebu-3 Pulp	PAU Kinnow-1 Peel	Pati Lebu Peel	Nagpur Pulp	BARI Lebu-1 Pulp	Gandharaj Pulp	BARI Lebu-2 Peel	Quercetin
400	41.99±4.32	48.55±8.6	23.23±4.44	31.1±4.7	60.61±0.23	67.06±0.24	64.65±0.85	77.77±0.34	76.43±0.3	77.9±1.5	79.19±0.57	73.03±1.38	78.43±0.07	77.72±0.67	68.82±1.22	75.74±0.17	81.37±1.17	80.65±1.08	79.87±1.01	72.17±0.99	77.29±0.67	76.36±0.77	75.97±0.56	76.51±0.72	81±0.16	82.94±0.8	84.9±0.32	86.03±0.71	85.93±0.1
200	31.73±3.26	36.68±6.5	17.55±3.35	23.49±3.55	45.8±0.18	50.66±0.18	48.84±0.64	58.75±0.25	57.74±0.22	58.85±1.13	59.83±0.43	55.18±1.04	59.26±0.05	58.72±0.51	52±0.92	57.22±0.13	61.48±0.89	60.94±0.81	60.35±0.76	54.53±0.75	58.39±0.51	57.69±0.58	57.4±0.43	57.81±0.54	61.19±0.12	62.66±0.6	64.14±0.24	65±0.53	64.93±0.07
100	23.97±2.46	27.71±4.91	13.26±2.53	17.75±2.68	34.6±0.13	38.28±0.13	36.9±0.48	44.39±0.19	43.63±0.17	44.47±0.85	45.2±0.32	41.69±0.79	44.77±0.04	44.37±0.38	39.28±0.69	43.23±0.09	46.45±0.67	46.04±0.61	45.59±0.58	41.2±0.56	44.12±0.38	43.59±0.44	43.37±0.32	43.67±0.41	46.23±0.09	47.34±0.46	48.46±0.18	49.11±0.4	49.05±0.05
50	18.11±1.86	20.94±3.71	10.02±1.91	13.41±2.02	26.14±0.1	28.92±0.1	27.88±0.36	33.54±0.14	32.96±0.12	33.6±0.64	34.15±0.24	31.5±0.59	33.83±0.03	33.52±0.29	29.68±0.52	32.66±0.07	35.09±0.5	34.78±0.46	34.45±0.43	31.12±0.42	33.33±0.29	32.93±0.33	32.76±0.24	33±0.31	34.93±0.07	35.77±0.34	36.61±0.13	37.1±0.3	37.06±0.04
25	13.68±1.4	15.82±2.8	7.57±1.44	10.13±1.53	19.75±0.07	21.85±0.07	21.06±0.27	25.34±0.11	24.9±0.09	25.38±0.48	25.8±0.18	23.8±0.45	25.56±0.02	25.32±0.22	22.42±0.39	24.68±0.05	26.51±0.38	26.28±0.35	26.02±0.33	23.51±0.32	25.18±0.22	24.88±0.25	24.75±0.18	24.93±0.23	26.39±0.05	27.02±0.26	27.66±0.1	28.03±0.23	28±0.03
FRAP Value (uM Fe[II]SO4.7H2O/100uL)
Conc	Pummelo Peel	Jara Lebu Peel	BARI Malta-1 Peel	CxL Hybrid Pulp	Pati Lebu Pulp	Satkara Lebu Peel	CxL Hybrid Peel	BARI Lebu-1 Peel	Nagpur Peel	BARI Lebu-3 Pulp	BARI Lebu-2 Pulp	Rangpur Peel	Satkara Lebu Pulp	Gandharaj Peel	Rangpur Pulp	BARI Lebu-3 Peel	Sharbati Peel	PAU Kinnow-1 Peel	BARI Malta-1 Pulp	Jara Lebu Pulp	Pummelo Pulp	PAU Kinnow-1 Pulp	Pati Lebu Peel	Nagpur Pulp	BARI Lebu-2 Peel	BARI Lebu-1 Pulp	Sharbati Pulp	Gandharaj Pulp	Quercetin
200	5.87±0.55	6.24±0.08	7.44±0.1	9.11±0.13	9.36±0.06	10.39±0.08	11.02±0.06	11.04±1.45	11.16±0.18	12.16±0.53	12.38±0.42	12.39±0.46	12.41±0.14	12.61±0.81	12.86±0.58	13.19±0.65	13.34±0.61	13.46±0.19	13.5±0.55	13.52±0.26	13.77±0.28	14.09±0.94	14.18±0.57	14.73±0.7	16.09±0.46	18.79±0.86	19.02±0.96	19.04±0.98	26.05±0.1

## Sheet: Table S5
Table S5: Antihyperglycemic Assay Parameter Values
α-amylase Inhibition (%)
Conc	BARI Lebu-1 Peel	BARI Lebu-1 Pulp	BARI Lebu-2 Peel	BARI Lebu-2 Pulp	BARI Lebu-3 Peel	BARI Lebu-3 Pulp	BARI Malta-1 Peel	BARI Malta-1 Pulp	CxL Hybrid Peel	CxL Hybrid Pulp	Gandharaj Peel	Gandharaj Pulp	Jara Lebu Peel	Jara Lebu Pulp	Nagpur Peel	Nagpur Pulp	Pati Lebu Peel	Pati Lebu Pulp	PAU Kinnow-1 Peel	PAU Kinnow-1 Pulp	Pummelo Peel	Pummelo Pulp	Rangpur Peel	Rangpur Pulp	Satkara Lebu Peel	Satkara Lebu Pulp	Sharbati Peel	Sharbati Pulp	Metformin HCl
200	46.61±5.53	25.57±0.48	22.09±0.81	45.98±2.71	66.97±1.11	31.02±1.83	34.99±3.92	64.63±0.49	46.87±1.32	33.75±2.94	39.29±4.92	70.97±1.9	80.53±0.43	50.09±1.33	52.76±3.69	70.41±1.56	64.56±1.21	33.47±3.13	31.53±0.74	36.54±0.33	37.82±2.29	59.26±0.43	54.65±2.59	30.57±4.13	36.07±1.73	46.66±0.8	72.53±1.31	77.35±0.56	96.49±1.17
t-Test	0.0472402	0.0188786	0.010235	0.0160473	0.000861656	0.988275	0.264154	0.000512933	0.00534889	0.310573	0.120415	0.00135621	0.000220225	0.00374858	0.0126478	0.00107468	0.00108722	0.369163	0.60111	0.0153443	0.0559848	0.000673423	0.00610144	0.891531	0.0668504	0.00330732	0.000782886	0.000291291	0.000277241
Sign	*	*	*	*	**	NS	NS	**	*	NS	NS	**	**	**	*	**	**	NS	NS	*	NS	**	*	NS	NS	**	**	**	**
α-glucosidase Inhibition (%)
Conc	BARI Lebu-1 Peel	BARI Lebu-1 Pulp	BARI Lebu-2 Peel	BARI Lebu-2 Pulp	BARI Lebu-3 Peel	BARI Lebu-3 Pulp	BARI Malta-1 Peel	BARI Malta-1 Pulp	CxL Hybrid Peel	CxL Hybrid Pulp	Gandharaj Peel	Gandharaj Pulp	Jara Lebu Peel	Jara Lebu Pulp	Nagpur Peel	Nagpur Pulp	Pati Lebu Peel	Pati Lebu Pulp	PAU Kinnow-1 Peel	PAU Kinnow-1 Pulp	Pummelo Peel	Pummelo Pulp	Rangpur Peel	Rangpur Pulp	Satkara Lebu Peel	Satkara Lebu Pulp	Sharbati Peel	Sharbati Pulp	Quercetin
200	37.01±7.05	81.46±5.54	69.09±3.09	42.54±6.44	49.36±8.71	41.98±2.38	23.69±7.18	57.94±3.65	36.67±9.8	27.29±1.15	44.82±4.61	93.95±3.51	23.03±9.27	58.37±7.45	39.51±5.9	67.35±1.47	65.59±5.31	27.82±7.52	52.87±8.78	63.3±6.22	12.86±8.09	58.48±5.78	43.19±6.05	45.89±5.01	29.27±10.34	44.55±2.04	50.57±6.97	86.72±8.28	101.49±0.15
t-Test	0.0680299	0.00624293	0.00565716	0.0407656	0.0384282	0.0189397	0.291307	0.0100768	0.102423	0.0640563	0.0250444	0.0029269	0.382857	0.0202503	0.0461472	0.00417241	0.0102351	0.178808	0.0322942	0.013278	0.777629	0.0150467	0.0364714	0.0252728	0.209802	0.0146973	0.0274294	0.00864441	0.00114857
Sign	*	*	*	*	*	*	NS	*	NS	NS	*	**	NS	*	*	**	*	NS	*	*	NS	*	*	*	NS	*	*	*	**

## Sheet: Table S6
Table S6: Serine Protease Inhibition Assay Parameter Values
Trypsin Inhibition (%)
	BARI Malta-1 Pulp	Satkara Lebu Pulp	PAU Kinnow-1 Pulp	BARI Lebu-2 Pulp	PAU Kinnow-1 Peel	Pummelo Pulp	Jara Lebu Peel	CxL Hybrid Peel	Nagpur Pulp	Rangpur Pulp	Sharbati Peel	BARI Lebu-3 Pulp	Jara Lebu Pulp	CxL Hybrid Pulp	Satkara Lebu Peel	BARI Lebu-2 Peel	Pummelo Peel	BARI Lebu-1 Pulp	Rangpur Peel	Nagpur Peel	Pati Lebu Peel	BARI Malta-1 Peel	Sharbati Pulp	Pati Lebu Pulp	Gandharaj Pulp	BARI Lebu-3 Peel	Gandharaj Peel	BARI Lebu-1 Peel	Quercetin
25	15.34±10.41	16.85±7.53	22.86±12.99	20.76±5.24	15.86±4.83	8.23±2.78	9.07±1.28	7.63±1.32	14.68±6.39	19.41±7.95	9.73±8.22	1.95±0.76	12.53±1.66	3.79±5.82	10.38±1.32	20.29±9.66	25.62±14.69	16.88±7.58	16.04±0.86	13.64±6.25	24.6±11.89	3.78±2.05	15.31±4	3.32±2.86	17.7±15.42	20.3±7.67	16.95±10.56	14.39±6.02	22.7±3.29
50	15.49±8.42	21.83±8.8	31.82±5.95	25.22±4.92	16.74±5.43	8.89±2.15	12.33±2.53	8.99±2.25	11.5±1.05	25.29±7.19	11.24±5.36	2.16±1.71	12.41±1.79	2.32±1.63	8.42±0.7	23.26±6.7	32.64±9.76	18.8±6.44	18.07±2.56	17.47±0.92	30.63±2.5	2.6±2.15	15.87±0.74	3.63±3.45	21.77±9.25	25.28±5.3	21.46±6.48	16.82±1.01	40.63±1.86
100	30.69±5.66	30.33±5.85	39.63±1.64	32.06±6.79	29.2±5.54	13.27±1.05	25.06±1.4	12.5±3.01	19.41±2.52	39.21±2.83	31.59±1.88	12.97±1.45	29.09±1.51	15.31±0.15	18.55±2.61	46.28±1.44	35.24±9.51	43.63±1.24	30.38±6.47	22.83±3.93	37.77±1.81	21.38±1.78	29.45±5.32	19.38±7.49	51.31±0.86	38.1±4.94	38.26±1.93	24.55±4.42	55.44±0.9
200	50.74±1	49.93±0.57	48.88±1.6	45.92±2.84	44.69±3.39	32.57±1.58	24.85±1.8	31.02±3.29	52.39±1.65	52.19±1.66	50.92±1.31	40.34±3.21	46.29±0.73	27.46±2.63	36.44±0.56	55.79±3.3	39.11±7.64	55.1±3.79	49.11±3.51	41.16±1.14	55.16±4.77	30.07±2.47	49.47±4.22	48.49±4.35	58.76±1.98	51.15±1.49	47.76±3.32	34.18±0.75	64.86±1.42
400	57±1.06	59.37±1.16	58.49±0.81	53.75±1.02	54.77±1.62	47.16±1.5	37.36±1.03	40.92±0.78	65.45±0.51	61.38±0.26	61.68±0.95	55.87±0.36	56.06±0.34	37±0.5	51.19±0.34	67.66±0.63	42.49±3.69	69.43±0.79	61.81±0.56	50.73±1.24	63.41±0.76	36.13±1.98	66.36±0.91	62.37±0.52	69.92±0.36	61.49±1.55	54.91±1.53	48.1±0.52	72.99±0.49

## Sheet: Table S7
Table S7A: Membrane Stabilization Assay Results
Heat Induced Hemolysis
	25	25	25	50	50	50	100	100	100	200	200	200	400	400	400
%inhibit	R1	R2	R3	R1	R2	R3	R1	R2	R3	R1	R2	R3	R1	R2	R3
Gandharaj Pulp	37.6592	38.7815	33.6937	55.257	57.2019	56.1983	62.33	61.9849	68.256	65.8522	66.8421	69.2031	72.219	74.5867	74.8036
BARI Lebu-2 Peel	31.3679	30.2311	32.3809	56.8058	58.6163	63.7415	61.2363	63.7136	64.1737	70.1156	74.689	69.947	74.4438	81.6447	74.9545
BARI Lebu-1 Pulp	31.2829	35.6349	34.6318	51.4151	51.9653	53.5211	59.0085	59.1214	58.3235	62.6594	63.1961	61.5385	67.9487	70.9677	67.9785
Sharbati Pulp	5.11464	3.41255	11.387	42.9901	42.5991	43.9173	47.7521	47.6675	50.758	51.1232	53.3666	53.0502	60.5006	60.5119	60.4192
Nagpur Pulp	25.5029	26.3406	26.853	60.4242	62.3011	61.0312	72.6223	62.1114	61.6519	64.2523	66.9213	65.4386	72.6838	71.0719	71.0094
Jara Lebu Peel	13.4524	9.32051	14.4431	43.4226	47.7975	48.209	53.266	56.1928	57.6478	61.3147	59.0857	59.2326	62.3809	60.236	64.1773
Aspirin	49.5446	46.2854	43.0491	54.8724	56.0465	59.1515	60.7081	64.0964	64.4697	76.592	81.1206	80.6667	96.0097	98.7093	94.1623
Hypotonicity Induced Hemolysis
	25	25	25	50	50	50	100	100	100	200	200	200	400	400	400
%inhibit	R1	R2	R3	R1	R2	R3	R1	R2	R3	R1	R2	R3	R1	R2	R3
Gandharaj Pulp	15.6019	15.6481	9.66921	65.085	60.6536	58.2518	58.3511	63.1137	67.4477	66.3209	69.969	67.3859	77.1028	77.1077	74.0134
BARI Lebu-2 Peel	12.6675	14.4304	20.3308	48.278	46.5989	47.8181	59.7288	51.9136	58.9577	65.335	63.1579	66.4255	65.9333	70.0565	66.2769
BARI Lebu-1 Pulp	7.73036	5.91327	4.5977	33.9059	18.5553	31.1665	52.918	50.065	50.0619	65.9206	55.9633	56.3371	62.5243	67.4165	58.2071
Sharbati Pulp	0.495356	0.434783	10.6733	34.7361	29.9751	38.0226	40.8892	40.6143	37.6909	51.3978	46.8965	51.7647	46.264	57.4622	51.495
Nagpur Pulp	11.4476	9.00783	6.51717	32.2012	35.5683	30.4401	46.7413	41.2621	40.8953	61.6147	54.6139	60.7962	63.3313	66.1943	63.2679
Jara Lebu Peel	3.23988	7.49834	4.39829	40.2113	38.8288	30.056	52.5507	48.5419	51.4304	50.7711	53.8558	57.3171	58.7978	59.0154	57.6025
Aspirin	36.8492	37.6389	30.4692	51.5281	49.6661	52.2573	63.4387	66.2937	63.0201	67.2947	73.291	70.1119	75.9788	83.5994	79.212
Table S7B: 15-LOX Inhibition Assay Results
For Control
Minute	1	2	3	4	5	6	7	8	9	10	A/dT	%inhibit
Blank	3.6297	3.64625	3.6789	3.699	3.7123	3.7023	3.7201	3.7556	3.7841	3.8021	0.0178991	0
R1
Minute	1	2	3	4	5	6	7	8	9	10	A/dT	%inhibit
C200	3.3893	3.4136	3.6687	3.9879	4.1212	4.2172	4.445	4.6372	4.6612	4.7812	0.167092	89.2879
C100	3.8098	3.9312	3.9547	3.9821	3.9921	4.198	4.264	4.3197	4.427	4.501	0.0761697	76.501
C50	3.8085	3.8881	3.8016	3.8201	3.8817	3.8946	4.0991	4.1786	4.1823	4.231	0.0521018	65.6459
C25	3.8787	3.8898	3.9101	3.9398	3.9549	3.9877	4.0001	4.187	4.201	4.284	0.0449958	60.2205
C12.5	3.9045	3.9089	3.9131	3.9348	3.9659	3.9809	3.9975	4.074	4.114	4.179	0.0297806	39.8968
C6.25	3.4185	3.4215	3.4913	3.5315	3.5676	3.5876	3.6061	3.5765	3.5901	3.6393	0.0232558	23.0337
R2
Minute	1	2	3	4	5	6	7	8	9	10	A/dT	%inhibit
C200	3.2949	3.4358	3.8083	3.9017	4.1092	4.3652	4.4429	4.6399	4.8186	4.8449	0.179801	90.0451
C100	3.7207	4.004	3.8805	3.8876	3.8687	4.2128	4.2126	4.293	4.3556	4.6461	0.0858873	79.1598
C25	3.9354	3.7388	3.934	3.9611	4.1116	3.9034	3.8929	4.2792	4.3385	4.4108	0.0593315	69.8321
C50	3.9324	4.0227	3.7446	3.7752	3.7935	3.9172	4.1277	4.2909	4.0442	4.2985	0.0445945	59.8626
C12.5	3.5938	3.5961	3.6172	3.6466	3.6582	3.6889	3.7891	3.7851	3.7982	3.8281	0.0292188	38.7412
C6.25	3.5638	3.5861	3.5872	3.5766	3.6128	3.6889	3.7891	3.7952	3.7981	3.6681	0.0253109	29.2831
R3
Minute	1	2	3	4	5	6	7	8	9	10	A/dT	%inhibit
C200	3.3396	3.3836	3.3986	3.6397	4.0126	4.2814	4.4964	4.6649	4.7862	4.8803	0.199121	91.0109
C100	3.5864	4.0064	3.7233	4.0817	3.8684	4.386	4.2702	4.1379	4.3697	4.7439	0.097677	81.6752
C50	3.783	4.1336	3.7892	3.8228	3.7795	4.0343	4.1092	4.3613	4.2168	4.3743	0.0598703	70.1036
C25	3.4452	3.447	3.503	3.531	3.6194	3.6266	3.9845	3.7343	3.6806	3.7343	0.0409776	56.3198
C12.5	3.5677	3.5774	3.5875	3.5976	3.6101	3.6841	3.7265	3.7697	3.7965	3.8043	0.0305139	41.3413
C6.25	3.5123	3.5315	3.5929	3.6123	3.6375	3.6384	3.6491	3.6969	3.7412	3.7664	0.0265824	32.6657
200 ug/mL
R1
Minute	1	2	3	4	5	6	7	8	9	10	A/dT	%inhibit
Blank	3.6297	3.64625	3.6789	3.699	3.7123	3.7023	3.7201	3.7556	3.7841	3.8021	0.0178991	0
Gand Juice	3.5765	3.6683	3.7908	3.9657	4.0029	4.0046	4.025	4.137	4.1448	4.381	0.0756764	76.3478
Zara Pe	3.8843	3.87158	3.9301	3.9423	3.9577	3.9677	3.9811	3.9837	3.991	4.0901	0.0186821	4.19102
BARI 2 Pe	3.4165	3.4431	3.493	3.5363	3.7148	3.7262	3.82	3.847	3.8411	3.823	0.0550121	67.4634
BARI 1 Juice	3.7497	3.8314	3.9094	3.9177	3.9342	3.9497	3.9888	3.9895	4.0001	4.101	0.0301327	40.5992
Sharbati Juice	3.8285	3.8394	3.8488	3.9126	3.9273	3.9252	3.9374	3.9429	3.9943	4.013	0.0199248	10.167
Nagpur Juice	3.5798	3.6745	3.6401	3.6757	3.628	3.8096	3.8301	3.8766	3.886	3.8687	0.0358055	50.0102
R2
Blank	3.6297	3.64625	3.6789	3.699	3.7123	3.7023	3.7201	3.7556	3.7841	3.8021	0.0178991	0
Gand Juice	3.5765	3.6683	3.7908	3.9657	4.0029	4.0046	4.025	4.137	4.1448	4.381	0.0756764	76.3478
Zara Pe	3.8843	3.87158	3.9301	3.9423	3.9577	3.9677	3.9811	3.9837	3.991	4.0901	0.0186821	4.19102
BARI 2 Pe	3.4165	3.4431	3.493	3.5363	3.7148	3.7262	3.82	3.847	3.8411	3.823	0.0550121	67.4634
BARI 1 Juice	3.7497	3.8314	3.9094	3.9177	3.9342	3.9497	3.9888	3.9895	4.0001	4.101	0.0301327	40.5992
Sharbati Juice	3.8285	3.8394	3.8488	3.9126	3.9273	3.9252	3.9374	3.9429	3.9943	4.013	0.0199248	10.167
Nagpur Juice	3.5798	3.6745	3.6401	3.6757	3.628	3.8096	3.8301	3.8766	3.886	3.8687	0.0358055	50.0102
R3
Blank	3.6297	3.64625	3.6789	3.699	3.7123	3.7023	3.7201	3.7556	3.7841	3.8021	0.0178991	0
Gand Juice	3.5765	3.6683	3.7908	3.9657	4.0029	4.0046	4.025	4.137	4.1448	4.381	0.0756764	76.3478
Zara Pe	3.8843	3.87158	3.9301	3.9423	3.9577	3.9677	3.9811	3.9837	3.991	4.0901	0.0186821	4.19102
BARI 2 Pe	3.4165	3.4431	3.493	3.5363	3.7148	3.7262	3.82	3.847	3.8411	3.823	0.0550121	67.4634
BARI 1 Juice	3.7497	3.8314	3.9094	3.9177	3.9342	3.9497	3.9888	3.9895	4.0001	4.101	0.0301327	40.5992
Sharbati Juice	3.8285	3.8394	3.8488	3.9126	3.9273	3.9252	3.9374	3.9429	3.9943	4.013	0.0199248	10.167
Nagpur Juice	3.5798	3.6745	3.6401	3.6757	3.628	3.8096	3.8301	3.8766	3.886	3.8687	0.0358055	50.0102
100 ug/mL
R1
Minute	1	2	3	4	5	6	7	8	9	10	A/dT	%inhibit
Blank	3.6297	3.64625	3.6789	3.699	3.7123	3.7023	3.7201	3.7556	3.7841	3.8021	0.0178991	0
Gand Juice	3.5765	3.6683	3.7908	3.9657	4.0029	4.0046	4.025	4.137	4.1448	4.381	0.0756764	76.3478
Zara Pe	3.8843	3.87158	3.9301	3.9423	3.9577	3.9677	3.9811	3.9837	3.991	4.0901	0.0186821	4.19102
BARI 2 Pe	3.4165	3.4431	3.493	3.5363	3.7148	3.7262	3.82	3.847	3.8411	3.823	0.0550121	67.4634
BARI 1 Juice	3.7497	3.8314	3.9094	3.9177	3.9342	3.9497	3.9888	3.9895	4.0001	4.101	0.0301327	40.5992
Sharbati Juice	3.8285	3.8394	3.8488	3.9126	3.9273	3.9252	3.9374	3.9429	3.9943	4.013	0.0199248	10.167
Nagpur Juice	3.5798	3.6745	3.6401	3.6757	3.628	3.8096	3.8301	3.8766	3.886	3.8687	0.0358055	50.0102
R2
Blank	3.6297	3.64625	3.6789	3.699	3.7123	3.7023	3.7201	3.7556	3.7841	3.8021	0.0178991	0
Gand Juice	3.5765	3.6683	3.7908	3.9657	4.0029	4.0046	4.025	4.137	4.1448	4.381	0.0756764	76.3478
Zara Pe	3.8843	3.87158	3.9301	3.9423	3.9577	3.9677	3.9811	3.9837	3.991	4.0901	0.0186821	4.19102
BARI 2 Pe	3.4165	3.4431	3.493	3.5363	3.7148	3.7262	3.82	3.847	3.8411	3.823	0.0550121	67.4634
BARI 1 Juice	3.7497	3.8314	3.9094	3.9177	3.9342	3.9497	3.9888	3.9895	4.0001	4.101	0.0301327	40.5992
Sharbati Juice	3.8285	3.8394	3.8488	3.9126	3.9273	3.9252	3.9374	3.9429	3.9943	4.013	0.0199248	10.167
Nagpur Juice	3.5798	3.6745	3.6401	3.6757	3.628	3.8096	3.8301	3.8766	3.886	3.8687	0.0358055	50.0102
R3
Blank	3.6297	3.64625	3.6789	3.699	3.7123	3.7023	3.7201	3.7556	3.7841	3.8021	0.0178991	0
Gand Juice	3.5765	3.6683	3.7908	3.9657	4.0029	4.0046	4.025	4.137	4.1448	4.381	0.0756764	76.3478
Zara Pe	3.8843	3.87158	3.9301	3.9423	3.9577	3.9677	3.9811	3.9837	3.991	4.0901	0.0186821	4.19102
BARI 2 Pe	3.4165	3.4431	3.493	3.5363	3.7148	3.7262	3.82	3.847	3.8411	3.823	0.0550121	67.4634
BARI 1 Juice	3.7497	3.8314	3.9094	3.9177	3.9342	3.9497	3.9888	3.9895	4.0001	4.101	0.0301327	40.5992
Sharbati Juice	3.8285	3.8394	3.8488	3.9126	3.9273	3.9252	3.9374	3.9429	3.9943	4.013	0.0199248	10.167
Nagpur Juice	3.5798	3.6745	3.6401	3.6757	3.628	3.8096	3.8301	3.8766	3.886	3.8687	0.0358055	50.0102
50 ug/mL
R1
Minute	1	2	3	4	5	6	7	8	9	10	A/dT	%inhibit
Blank	3.6297	3.64625	3.6789	3.699	3.7123	3.7023	3.7201	3.7556	3.7841	3.8021	0.0178991	0
Gand Juice	3.5765	3.6683	3.7908	3.9657	4.0029	4.0046	4.025	4.137	4.1448	4.381	0.0756764	76.3478
Zara Pe	3.8843	3.87158	3.9301	3.9423	3.9577	3.9677	3.9811	3.9837	3.991	4.0901	0.0186821	4.19102
BARI 2 Pe	3.4165	3.4431	3.493	3.5363	3.7148	3.7262	3.82	3.847	3.8411	3.823	0.0550121	67.4634
BARI 1 Juice	3.7497	3.8314	3.9094	3.9177	3.9342	3.9497	3.9888	3.9895	4.0001	4.101	0.0301327	40.5992
Sharbati Juice	3.8285	3.8394	3.8488	3.9126	3.9273	3.9252	3.9374	3.9429	3.9943	4.013	0.0199248	10.167
Nagpur Juice	3.5798	3.6745	3.6401	3.6757	3.628	3.8096	3.8301	3.8766	3.886	3.8687	0.0358055	50.0102
R2
Blank	3.6297	3.64625	3.6789	3.699	3.7123	3.7023	3.7201	3.7556	3.7841	3.8021	0.0178991	0
Gand Juice	3.5765	3.6683	3.7908	3.9657	4.0029	4.0046	4.025	4.137	4.1448	4.381	0.0756764	76.3478
Zara Pe	3.8843	3.87158	3.9301	3.9423	3.9577	3.9677	3.9811	3.9837	3.991	4.0901	0.0186821	4.19102
BARI 2 Pe	3.4165	3.4431	3.493	3.5363	3.7148	3.7262	3.82	3.847	3.8411	3.823	0.0550121	67.4634
BARI 1 Juice	3.7497	3.8314	3.9094	3.9177	3.9342	3.9497	3.9888	3.9895	4.0001	4.101	0.0301327	40.5992
Sharbati Juice	3.8285	3.8394	3.8488	3.9126	3.9273	3.9252	3.9374	3.9429	3.9943	4.013	0.0199248	10.167
Nagpur Juice	3.5798	3.6745	3.6401	3.6757	3.628	3.8096	3.8301	3.8766	3.886	3.8687	0.0358055	50.0102
R3
Blank	3.6297	3.64625	3.6789	3.699	3.7123	3.7023	3.7201	3.7556	3.7841	3.8021	0.0178991	0
Gand Juice	3.5765	3.6683	3.7908	3.9657	4.0029	4.0046	4.025	4.137	4.1448	4.381	0.0756764	76.3478
Zara Pe	3.8843	3.87158	3.9301	3.9423	3.9577	3.9677	3.9811	3.9837	3.991	4.0901	0.0186821	4.19102
BARI 2 Pe	3.4165	3.4431	3.493	3.5363	3.7148	3.7262	3.82	3.847	3.8411	3.823	0.0550121	67.4634
BARI 1 Juice	3.7497	3.8314	3.9094	3.9177	3.9342	3.9497	3.9888	3.9895	4.0001	4.101	0.0301327	40.5992
Sharbati Juice	3.8285	3.8394	3.8488	3.9126	3.9273	3.9252	3.9374	3.9429	3.9943	4.013	0.0199248	10.167
Nagpur Juice	3.5798	3.6745	3.6401	3.6757	3.628	3.8096	3.8301	3.8766	3.886	3.8687	0.0358055	50.0102
Me	%inhibit	SD				200	100	50
6.25	28.3275	3.98987			Jara Le	4.19102	3.67932	3.23009	125.255	47.0258
12.5	39.9931	2.11262	IC50 (ug/mL)		Sharbati Pulp	10.167	8.92565	7.83586	48.5648	2834.54
25	58.801	2.04036	18.2355		BARI Le	40.5992	35.6422	31.2904	22.5168	351.528
50	68.5272	1.76053			Nagpur Pulp	50.0102	43.9041	38.5436	19.2655	195.423
100	79.112	1.06367			BARI Le	67.4634	58.2264	41.9951	8.61825	79.5281
200	90.1146	0.705161			Gandharaj Pulp	76.3478	57.0261	52.8425	4.32155	42.1098
					Que				3.25499	18.2355

## Sheet: Table S8
Table S8A: Descriptive Statistical Values of Variables
	N	Mean	SD	Sum	Min	Max
"Crude Protein Quantity (µg/mL)"	28	151.163	24.464	4232.57	108.089	187.26
"Total Phenolic Content (µM QE)"	28	0.5392	0.28966	15.0976	0.0691	0.9893
"DPPH EC50 (µg/mL)"	28	427.921	176.529	11981.8	139.442	826.845
"H2O2 EC50 (µg/mL)"	28	496.478	310.967	13901.4	127.112	1548.08
"Reducing Power EC50 (µg/mL)"	28	251.458	206.155	7040.83	134.318	1047.77
"FRAP Value (µM Fe[II]SO4.7H2O/100uL)"	28	12.6174	3.30164	353.288	5.873	19.0474
"%Inhibition of α-Amylase"	28	48.7032	16.9192	1363.69	22.0944	80.533
"%Inhibition of α-Glucosidase"	28	49.119	19.7001	1375.33	12.8679	93.9522
"IC50 Value against Serine Protease"	28	323.431	94.6223	9056.07	200.559	565.065
"Prothrombin Time (Minutes)"	28	11.8911	9.58308	332.95	5.8633	40.9852
"%Inhibition of Platelet Aggregation"	28	34.5734	19.689	968.056	2.16049	75.6173
"IC50 Value against 15-LOX (µg/mL)"	6	1843.51	2997.84	11061	42.1098	7557.9
"IC50 Value against Heat Induced Hemolysis (µg/mL)"	6	101.58	86.6405	609.478	25.215	233.606
"IC50 Value against Hypotonicity Induced Hemolysis (µg/mL)"	6	188.25	74.4181	1129.5	74.66	281.881
Table S8B: Intervariable Correlation Coefficient and Level of Significance Values
Pearson Correlations
		Crude Protein Quantity (µg/mL)	Total Phenolic Content (µM QE)	DPPH EC50 (µg/mL)	H2O2 EC50 (µg/mL)	Reducing Power EC50 (µg/mL)	FRAP Value (uM Fe[II]SO4.7H2O/100uL)	%Inhibition of α-Amylase	%Inhibition of α-Glucosidase	IC50 Value against Serine Protease	Prothrombin Time (Minutes)	%Inhibition of Platelet Aggregation	IC50 Value against 15-LOX (µg/mL)	IC50 Value against Heat Induced Hemolysis (µg/mL)	IC50 Value against Hypotonicity Induced Hemolysis (µg/mL)
"Crude Protein Quantity (µg/mL)"	Pearson Corr.	1	-0.00542	0.06013	-0.04662	-0.18111	-0.06947	0.12139	-0.000537204	0.0566	0.01942	-0.07737	0.16076	0.24443	0.63942
	p-value	--	0.97818	0.76118	0.81378	0.35636	0.72539	0.53833	0.99784	0.77482	0.92188	0.69557	0.76094	0.64066	0.17159
"Total Phenolic Content (µM QE)"	Pearson Corr.	-0.00542	1	0.02458	-0.14538	0.19629	0.04518	-0.1979	0.02324	0.13094	0.22421	0.18462	-0.9336*	-0.92161*	-0.50529
	p-value	0.97818	--	0.90118	0.46042	0.31679	0.81943	0.31274	0.90657	0.50658	0.25139	0.34696	0.00647	0.00898	0.30656
"DPPH EC50 (µg/mL)"	Pearson Corr.	0.06013	0.02458	1	0.84365*	0.55481*	-0.91672*	-0.0446	-0.86093*	0.79895*	-0.53811*	-0.67102*	0.71606	0.81918*	0.77227
	p-value	0.76118	0.90118	--	1.71867e-08	0.00218	7.33074e-12	0.82171	4.15537e-09	3.44853e-07	0.00314	9.29446e-05	0.10949	0.04609	0.07189
"H2O2 EC50 (µg/mL)"	Pearson Corr.	-0.04662	-0.14538	0.84365*	1	0.61967*	-0.78513*	0.04604	-0.71782*	0.58463*	-0.39244*	-0.49215*	0.77697	0.88565*	0.78618
	p-value	0.81378	0.46042	1.71867e-08	--	0.000437	7.51689e-07	0.81605	1.70723e-05	0.00109	0.03886	0.00781	0.06907	0.01887	0.06369
"Reducing Power EC50 (µg/mL)"	Pearson Corr.	-0.18111	0.19629	0.55481*	0.61967*	1	-0.48079*	-0.12443	-0.47735*	0.60828*	-0.26315	-0.5228*	0.59968	0.6846	0.78952
	p-value	0.35636	0.31679	0.00218	0.000437079	--	0.0096	0.52813	0.01021	0.000594533	0.17607	0.00431	0.20831	0.13353	0.06179
"FRAP Value (uM Fe[II]SO4.7H2O/100uL)"	Pearson Corr.	-0.06947	0.04518	-0.91672*	-0.78513*	-0.48079*	1	0.17241	0.97136*	-0.71439*	0.53881*	0.64127*	-0.519	-0.29283	-0.10343
	p-value	0.72539	0.81943	7.33074e-12	7.51689e-07	0.0096	--	0.38032	9.42249e-18	1.95411e-05	0.00309	0.000235796	0.2914	0.57331	0.84541
"%Inhibition of α-Amylase"	Pearson Corr.	0.12139	-0.1979	-0.0446	0.04604	-0.12443	0.17241	1	0.2831	0.00152	0.2136	0.09037	0.11542	0.18472	0.16763
	p-value	0.53833	0.31274	0.82171	0.81605	0.52813	0.38032	--	0.14435	0.99389	0.2751	0.64742	0.82763	0.72607	0.75092
"%Inhibition of α-Glucosidase"	Pearson Corr.	-0.000537	0.02324	-0.86093*	-0.71782*	-0.47735*	0.97136*	0.2831	1	-0.66635*	0.59123*	0.64969*	-0.51791	-0.34832	-0.24202
	p-value	0.99784	0.90657	4.15537e-09	1.70723e-05	0.01021	9.42249e-18	0.14435	--	0.000108286	0.0009224	0.00018298	0.2926	0.49865	0.64405
"IC50 Value against Serine Protease"	Pearson Corr.	0.0566	0.13094	0.79895*	0.58463*	0.60828*	-0.71439*	0.00152	-0.66635*	1	-0.43386*	-0.64192*	0.83668*	0.8068	0.66275
	p-value	0.77482	0.50658	3.44853e-07	0.00109	0.000595	1.95411e-05	0.99389	0.000108286	--	0.02107	0.000231256	0.03783	0.05238	0.15143
"Prothrombin Time (Minutes)"	Pearson Corr.	0.01942	0.22421	-0.53811*	-0.39244*	-0.26315	0.53881*	0.2136	0.59123*	-0.43386*	1	0.64138*	-0.70511	-0.79838	-0.73105
	p-value	0.92188	0.25139	0.00314	0.03886	0.17607	0.00309	0.2751	0.000922352	0.02107	--	0.000235024	0.11762	0.05688	0.09878
"%Inhibition of Platelet Aggregation"	Pearson Corr.	-0.07737	0.18462	-0.67102*	-0.49215*	-0.5228*	0.64127*	0.09037	0.64969*	-0.64192*	0.64138*	1	-0.73816	-0.85949*	-0.88388*
	p-value	0.69557	0.34696	9.29446e-05	0.00781	0.00431	0.000235796	0.64742	0.00018298	0.000231256	0.000235	--	0.09386	0.02823	0.01944
"IC50 Value against 15-LOX (µg/mL)"	Pearson Corr.	0.16076	-0.9336*	0.71606	0.77697	0.59968	-0.519	0.11542	-0.51791	0.83668*	-0.70511	-0.73816	1	0.92909*	0.4741
	p-value	0.76094	0.00647	0.10949	0.06907	0.20831	0.2914	0.82763	0.2926	0.03783	0.11762	0.09386	--	0.00736	0.34214
"IC50 Value against Heat … (µg/mL)"	Pearson Corr.	0.24443	-0.92161*	0.81918*	0.88565*	0.6846	-0.29283	0.18472	-0.34832	0.8068	-0.79838	-0.85949*	0.92909*	1	0.7256
	p-value	0.64066	0.00898	0.04609	0.01887	0.13353	0.57331	0.72607	0.49865	0.05238	0.05688	0.02823	0.00736	--	0.10261
"IC50 Value against Hypotonicity… (µg/mL)"	Pearson Corr.	0.63942	-0.50529	0.77227	0.78618	0.78952	-0.10343	0.16763	-0.24202	0.66275	-0.73105	-0.88388*	0.4741	0.7256	1
	-value	0.17159	0.30656	0.07189	0.06369	0.06179	0.84541	0.75092	0.64405	0.15143	0.09878	0.01944	0.34214	0.10261	--

## Sheet: Table S9
Table S9A: Physicochemical Properties of Identified Peptides
Assigned Id	Lenth	Mol wt	pI	Charge	Amphipathicity	Hydrophobicity	Hydrophilicity	GRAVY Score	Steric hindrance
B2P_01	5	602.79	10.11	1	0.49	-0.05	-0.36	0.6	0.59
B2P_02	7	815.03	6.36	0	0.53	-0.23	0.33	-0.4	0.57
B2P_03	8	876.09	9.11	1	0.46	-0.11	-0.32	-0.575	0.59
B2P_04	4	587.73	10.11	1	0.93	-0.39	-0.42	-1.175	0.64
B2P_05	7	865.09	6.35	0	0.53	-0.14	-0.11	0.3	0.65
B2P_06	5	617.76	9.11	1	0.73	-0.25	-0.1	-1.58	0.52
B2P_07	8	927.25	8.57	1.5	0.64	0.05	-0.75	0.4375	0.51
B2P_08	10	1163.31	4.38	-1	0.37	-0.36	0.39	-1.67	0.68
B2P_09	7	904.13	4.54	-1	0.89	-0.14	0.33	-0.614	0.61
B2P_10	5	571.74	9.11	1	0.73	-0.29	0.2	-1.18	0.57
B2P_11	9	1232.39	4.22	-2.5	0.57	-0.38	0.76	-1.778	0.6
B2P_12	4	515.62	10.11	1	0.93	-0.64	0.47	-1.825	0.71
B2P_13	11	1375.66	4.26	-2	0.57	-0.22	0.32	-0.681	0.64
B2P_14	8	1031.28	4.38	-1	0.62	-0.13	0.16	-1.05	0.57
B2P_15	11	1314.59	3.67	-2	0.23	-0.04	-0.32	-0.372	0.66
B2P_16	12	1601	8.93	1	0.2	-0.01	-1.17	-0.425	0.55
GRJ_01	8	828.08	9.11	1	0.46	-0.12	0.04	-0.237	0.51
GRJ_02	5	561.69	5.88	0	0	0.03	-0.7	-0.22	0.53
GRJ_03	4	560.66	9.11	1	0.92	-0.5	0	-2.95	0.68
GRJ_04	8	876.15	9.11	1	0.61	-0.05	-0.34	-0.1625	0.65
GRJ_05	5	499.57	4	-1	0.25	-0.15	0.56	-1.14	0.49
GRJ_06	5	488.64	9.11	1	0.73	-0.07	0.1	0.54	0.56
GRJ_07	5	574.69	4.38	-1	0.99	-0.29	1.34	-0.92	0.67
GRJ_08	8	975.18	4.38	-1	0.47	-0.2	0.29	-0.6625	0.63
GRJ_09	10	1142.51	9.11	1	0.37	-0.06	-0.42	-0.07	0.57
GRJ_10	7	806.03	3.8	-2	0.36	0.19	-0.23	1.128	0.67
GRJ_11	9	1159.53	5.84	0	0	0.32	-1.76	1.522	0.57
THP_01	32	3466.55	10.95	6.5	0.73	-0.28	0.31	-0.506	0.62
THP_02	20	2180.61	3.91	-4	0.38	-0.13	0.37	-0.985	0.64
THP_03	29	3483.21	7.09	0.5	0.47	-0.26	-0.06	-0.989	0.62
Table S9B: Toxicity and Bioavailability Properties of Identified Peptides
Assigned Id	Hepatotoxicity	Carcinogenicity	Immunotoxicity	Mutagenicity	Cytotoxicity	LD50 (mg/kg)	Toxicity Class	Toxin-pred Prediction	Allergenicity	Half-life (Hours)	Instability Index	Class	Cell Penetration
B2P_01	Inactive	Inactive	Active	Inactive	Inactive	1190	4	Non-Toxin	Moderate Allergen	20	85.04	Unstable	Non-CPP
B2P_02	Inactive	Inactive	Inactive	Inactive	Inactive	2000	4	Non-Toxin	Non-Allergen	>20	29.29	Stable	Non-CPP
B2P_03	Inactive	Inactive	Inactive	Inactive	Inactive	300	3	Non-Toxin	Non-Allergen	5.5	-12.48	Stable	Non-CPP
B2P_04	Inactive	Inactive	Inactive	Inactive	Inactive	1500	4	Non-Toxin	Moderate Allergen	2.8	-7.08	Stable	Non-CPP
B2P_05	Inactive	Inactive	Inactive	Inactive	Inactive	2500	5	Non-Toxin	Non-Allergen	>20	52.83	Unstable	Non-CPP
B2P_06	Inactive	Inactive	Inactive	Inactive	Inactive	300	3	Probable Toxin	Moderate Allergen	>20	8	Stable	Non-CPP
B2P_07	Inactive	Inactive	Inactive	Inactive	Inactive	2400	5	Non-Toxin	Non-Allergen	>20	-0.17	Stable	Non-CPP
B2P_08	Inactive	Inactive	Inactive	Inactive	Inactive	2400	5	Non-Toxin	Non-Allergen	>10	24.57	Stable	CPP
B2P_09	Inactive	Inactive	Inactive	Inactive	Inactive	300	3	Non-Toxin	Non-Allergen	20	36.09	Stable	Non-CPP
B2P_10	Inactive	Inactive	Inactive	Inactive	Inactive	2000	4	Non-Toxin	Moderate Allergen	5.5	2.24	Stable	Non-CPP
B2P_11	Inactive	Inactive	Inactive	Inactive	Inactive	2400	5	Non-Toxin	Moderate Allergen	>10	14.22	Stable	Non-CPP
B2P_12	Inactive	Inactive	Inactive	Inactive	Inactive	720	4	Non-Toxin	Moderate Allergen	>20	-7.08	Stable	Non-CPP
B2P_13	Inactive	Inactive	Inactive	Inactive	Inactive	2400	5	Non-Toxin	Non-Allergen	>20	38.04	Stable	CPP
B2P_14	Inactive	Inactive	Inactive	Inactive	Inactive	500	4	Non-Toxin	Non-Allergen	5.5	4.55	Stable	Non-CPP
B2P_15	Inactive	Inactive	Inactive	Inactive	Inactive	2500	5	Non-Toxin	Non-Allergen	>20	32.75	Stable	CPP
B2P_16	Inactive	Inactive	Inactive	Inactive	Inactive	6000	6	Non-Toxin	Non-Allergen	>20	32.63	Stable	CPP
GRJ_01	Inactive	Inactive	Inactive	Inactive	Inactive	2000	4	Non-Toxin	Non-Allergen	5.5	111.83	Unstable	Non-CPP
GRJ_02	Inactive	Inactive	Inactive	Inactive	Inactive	1000	4	Non-Toxin	Non-Allergen	>20	56.12	Unstable	Non-CPP
GRJ_03	Inactive	Inactive	Inactive	Inactive	Inactive	500	4	Non-Toxin	Non-Allergen	1.4	-12.74	Stable	Non-CPP
GRJ_04	Inactive	Inactive	Inactive	Inactive	Inactive	1000	4	Non-Toxin	Moderate Allergen	5.5	30.71	Stable	Non-CPP
GRJ_05	Inactive	Inactive	Inactive	Inactive	Inactive	2000	4	Non-Toxin	Non-Allergen	0.5	172.92	Unstable	Non-CPP
GRJ_06	Inactive	Inactive	Inactive	Inactive	Inactive	1480	4	Non-Toxin	Allergen	>20	8	Stable	Non-CPP
GRJ_07	Inactive	Inactive	Inactive	Inactive	Inactive	2000	4	Non-Toxin	Moderate Allergen	>10	-8.98	Stable	Non-CPP
GRJ_08	Inactive	Inactive	Inactive	Inactive	Inactive	2400	5	Non-Toxin	Moderate Allergen	>10	8.75	Stable	Non-CPP
GRJ_09	Inactive	Inactive	Inactive	Inactive	Inactive	1000	4	Non-Toxin	Moderate Allergen	>10	44.64	Unstable	CPP
GRJ_10	Inactive	Inactive	Inactive	Inactive	Inactive	96	3	Non-Toxin	Non-Allergen	7.2	8.57	Stable	Non-CPP
GRJ_11	Inactive	Inactive	Inactive	Inactive	Inactive	300	3	Non-Toxin	Non-Allergen	1.1	31.52	Stable	Non-CPP
THP_01	Active	Inactive	Active	Inactive	Active	37	2	Probable Toxin	Non-Allergen	>10	86.78	Unstable	CPP
THP_02	Active	Inactive	Inactive	Inactive	Active	150	3	Probable Toxin	Non-Allergen	1.1	77.45	Unstable	CPP
THP_03	Inactive	Inactive	Active	Inactive	Inactive	73	3	Non-Toxin	Allergen	3.5	56.03	Unstable	CPP

## Sheet: Table S10
Table S10 Receptor File Definition and Binding Cavity Parameters
PDB	Receptor Definition	Cofactor	X	Y	Z	DeepSite Score
1LOX	Human arachidonate 15-lipoxygenase	Fe	-6.9	142.1	48	1
3v99	Human arachidonate 5-lipoxygenase	Fe	17.5	-80.3	-31.6	1
4W93	Human pancreatic alpha-amylase	Ca2+	-6	6.5	-22.5	1
1EZQ	Human Coagulation Factor X	Ca2+	9.1	5.7	21.2	1
1A2C	Human Thrombin	-	16.2	-13.3	21.3	1
3VW7	Platelet Proteinase-activated Receptor 1	-	-7.2	-10.7	60.7	1
2WPM	Human Coagulation Factor IX	Ca2+	8.8	-14.3	-3.1	0.97
5NN8	Human lysosomal alpha-glucosidase	-	11.8	-22.3	110.6	0.98
1M10	Glycoprotein Ib Platelet Subunit Alpha	-	-11.9	-46.3	42.1	0.98
6Y3C	Prostaglandin G Synthase 1	-	-14.4	-60	-0.5	1
5F19	Prostaglandin G Synthase 2	Protoheme	28.2	29.4	64.2	1
[HM]	Thromboxane A Synthase 2	Protoheme	16.3	34.2	-13	1
1M10	Von Willebrand factor	-	-18.7	-41.9	35.1	0.94
